# Supplementary material for: Effects and consideration of storm movement in rainfall–runoff modelling at the basin scale
Source: Copernicus journal article supplement (doi:10.5194/hess-20-5063-2016), 2016-12-21
Supplement: Supplementary file 1 [file hess-20-5063-2016-supplement.zip]

Archive with 3 entries (3 files):
- hess-20-5063-2016-supplement-title-page.pdf
- Source Data 2.xls
- Source Data 1.xls
