# Supplementary material for: Effects and consideration of storm movement in rainfall–runoff modelling at the basin scale
Source: Copernicus journal article supplement (doi:10.5194/hess-20-5063-2016), 2016-12-21
Supplement: Supplementary file 1 [file hess-20-5063-2016-supplement.zip › hess-20-5063-2016-supplement-title-page.pdf]

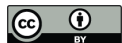

## *Supplement of*

# **Effects and consideration of storm movement in rainfall–runoff modelling at the basin scale**

**Shahram Khalighi Sigaroodi and Qiuwen Chen**

*Correspondence to:* Qiuwen Chen (qwchen@nhri.cn)

- [hess-20-5063-2016-supplement-title-page.pdf](#)
- [Source Data 1.xls](#)
- [Source Data 2.xls](#)

The copyright of individual parts of the supplement might differ from the CC-BY 3.0 licence.
