# Supplementary material for: Effects and consideration of storm movement in rainfall–runoff modelling at the basin scale
Source: Copernicus journal article supplement (doi:10.5194/hess-20-5063-2016), 2016-12-21
Supplement: Supplementary file 1 [file hess-20-5063-2016-supplement.zip › Source Data 2.xls]

## Sheet: Sheet1
	year	month	day		time	بي بكران	ديزج	بابا رود	قاسملو
70-71	70	8	12	2	2	2.6	12.58	2.89
		8		4	4	2.6	15.3	2.89
		8		6	6	2.76	18.3	2.89
		8		8	8	2.76	21.2	2.89
		8		10	10	3.75	19.5	3.9
		8		12	12	5.19	18.3	4.95
		8		14	14	6.72	17.1	6
		8		16	16	8.43	15.9	7.12
		8		18	18	8.72	15.3	7.76
		8		20	20	9.32	14.7	8.24
		8		22	22	9.65	14.1	8.88
		8		24	24	9.98	13.5	9.53
70-71	70	8	13	26	2			8.24
		8		28	4			8.56
		8		30	6			8.72
		8		32	8			12.19
		8		34	10			15.2
		8		36	12			13.15
		8		38	14			10.37
		8		40	16			12.75
		8		42	18			12.75
		8		44	20			9.87
		8		46	22			9.04
		8		48	24			8.88
70-71	71	1	8	50	2	10.3
		1		52	4	10.3
		1		54	6	10.3
		1		56	8	10.3
		1		58	10	11.92
		1		60	12	14.5
		1		62	14	19.12
		1		64	16	24.25
		1		66	18	22.6
		1		68	20	21.5
		1		70	22	20.55
		1		72	24	18.65
70-71	71	1	10	74	2	16.3	18.9	17.02
		1		76	4	15.4	17.1	18.86
		1		78	6	14.5	15.9	18.4
		1		80	8	14.5	15.3	17.94
		1		82	10	15.85	15.3	17.02
		1		84	12	24.25	14.7	16.57
		1		85	13			16.11
		1		86	14	27	14.1	16.57
		1		88	16	34	14.7	17.48
		1		90	18	30.5	18.3	16.11
		1		91	19			15.66
		1		92	20	27	25.45	16.11
		1		94	22	24.25	31.72	18.4
		1		96	24	21.5	29.86	22.27
70-71	71	1	11	122	2	17.22		25.8
		1		124	4	14.95		27.51
		1		126	6	12.25		25.22
		1		128	8	14.5		22.27
		1		130	10	17.22		20.29
		1		132	12	19.6		19.09
		1		134	14	23.7		18.17
		1		136	16	27		17.48
		1		138	18	24.8		16.11
		1		140	20	22.6		15.43
		1		142	22	20.55		17.48
		1		144	24	18.65		20.54
70-71	71	1	12	146	2			23.85
		1		148	4			25.22
		1		150	6			23.32
		1		152	8			21.26
		1		154	10			19.32
		1		156	12			18.17
		1		158	14			17.25
		1		160	16			16.57
		1		162	18			15.88
		1		164	20			15.2
		1		166	22			14.75
		1		168	24			15.2
70-71	71	1	23	170	2	36.28		16.11	10.38
		1		172	4	43.38		17.48	10.65
		1		174	6	51.5		18.86	11.19
		1		176	8	60.5		20.29	12
		1		178	10	46.05		20.78	13.52
		1		180	12	34		21.51	14.66
		1		182	14	24.25		21.26	15.8
		1		184	16	16.75		20.29	17.45
		1		186	18	17.7		19.81	22.01
		1		188	20	19.12		19.32	27.69
		1		190	22	20.08		19.32	34.7
		1		192	24	21.5		20.29	41.4
70-71	71	1	24	194	2	40.08	26.301	21.75	53.7
		1		196	4	46.94	27.15	24.37	65.08
		1		198	6	53.5	28	28.95	76.92
		1		200	8	83.3	28.93	34.8	76.92
		1		202	10	109.7	49	39.21	76.92
		1		204	12	134.7	141.2	42.88	76.92
		1		206	14	121.4	124.8	59.44	76.92
		1		208	16	95.7	174	77.2	76.92
		1		209	17		225.22
		1		210	18	83.3	215	177.75	70.15
		1		212	20	53.5	178.1	235.95	58.74
		1		214	22	47.83	141.2	257.07	51.18
		1		216	24	42.49	116.6	265.8	43.4
70-71	71	1	25	218	2		106.65	153.93
		1		220	4		88.23	107.51
		1		222	6		75.61	106.72
		1		224	8		65.18	105.15
		1		226	10		59.56	94.19
		1		228	12		51.64	84.32
		1		230	14		47.83	74.94
		1		232	16		45.49	60.3
		1		234	18		44.32	57.3
		1		236	20		43.15	54.74
		1		238	22		43.15	45.22
		1		240	24		44.32	42.88
70-71	71	1	29	242	2		26.3	31.62
		1		243	3		33.58
		1		244	4		28	34.8
		1		246	6		31.72	39.21
		1		248	8		35.44	41.76
		1		250	10		37.3	46.42
		1		252	12		31.72	53.03
		1		254	14		26.3	58.16
		1		256	16		25.45	47.22
		1		258	18		23.75	43.25
		1		260	20		22.9	41.02
		1		262	22		21.2	39.21
		1		264	24		19.5	40.27
70-71	71	2	1	266	2		15.9	27.8
		2		268	4		15.9	28.95
		2		270	6		16.5	29.52
		2		272	8		16.5	29.81
		2		274	10		17.7	30.71
		2		276	12		18.3	31.32
		2		278	14		19.5	31.93
		2		280	16		22.9	33.15
		2		282	18		24.6	37.14
		2		284	20		28	38.86
		2		286	22		34.51	40.64
		2		288	24		52.96	48.45
70-71	71	2	2	290	2	34	63.2	56.45
		2		292	4	36.28	68.16	61.8
		2		294	6	38.56	89.82	71.05
		2		296	8	40.84	98.85	95.58
		2		298	10	39.32	77.1	119.06
		2		300	12	37.04	58.24	134.32
		2		302	14	34.76	49	128.47
		2		304	16	33.3	45.49	110.69
		2		306	18	31.9	43.15	88.79
		2		308	20	30.5	41.98	74.38
		2		310	22	29.1	41.98	68.94
		2		312	24	27.7	41.98	66.86
70-71	71	2	3	314	2			77.28
		2		316	4			78.36
		2		318	6			75.12
		2		320	8			70.08
		2		322	10			64.51
		2		324	12			60.09
		2		326	14			56.92
		2		328	16			55.38
		2		330	18			53.16
		2		332	20			52.42
		2		334	22			51
		2		336	24			51.7
70-71	71	2	19	338	2	25.35	24.6	38.72	9.57
		2		340	4	27	26.3	41.95	11.19
		2		342	6	29.1	28.93	43.34	13.14
		2		344	8	36.28	28	44.72	13.14
		2		346	10	39.32	26.3	45.42	12
		2		348	12	43.38	26.3	46.81	11.46
		2		350	14	46.94	27.15	47.51	10.65
		2		352	16	49.61	29.86	48.2	9.84
		2		354	18	52.5	34.51	47.51	9.3
		2		356	20	50.5	39.64	54.64	8.88
		2		358	22	49.61	49	58.48	9.09
		2		360	24	48.82	58.24	62.73	9.3
70-71	71	2	20	362	2			66.79
		2		364	4			71.55
		2		366	6			75.66
		2		368	8			79.48
		2		370	10			82.41
		2		372	12			81.24
		2		374	14			76.74
		2		376	16			71.55
		2		378	18			63.17
		2		380	20			58.87
		2		382	22			58.09
		2		384	24			57.31
70-71	71	2	21	386	2	37.8	39.64		6.18
		2		388	4	37.04	38.47		6.01
		2		390	6	36.28	36.37		6.01
		2		392	8	35.52	35.44		6.01
		2		394	10	39.32	34.51		7.03
		2		396	12	43.38	33.58		8.04
		2		398	14	47.83	32.65		9.3
		2		400	16	52.5	31.72		10.65
		2		402	18	50.5	36.37		10.38
		2		404	20	49.61	62.2		10.38
		2		405	21		65.18
		2		406	22	47.83	58.24		10.11
		2		408	24	46.94	69.65		10.11
		2		409	1		77.1
70-71	71	2	22	410	2		74.12	67.38
		2		412	4		58.24	79.5
		2		414	6		52.96	86.86
		2		416	8		50.32	99.15
		2		418	10		44.32	93.52
		2		420	12		39.64	73.83
		2		422	14		37.3	71.05
		2		424	16		83.46	60.8
		2		425	17		100.7
		2		426	18		83.46	58.59
		2		428	20		54.28	73.83
		2		430	22		41.98	97.72
		2		432	24		37.3	254.16
70-71	71	2	23	434	2			114.82
		2		436	4			102.79
		2		438	6			99.15
		2		440	8			96.3
		2		442	10			84.96
		2		444	12			77.77
		2		446	14			69.98
		2		448	16			60.8
		2		450	18			51.34
		2		452	20			50.51
		2		454	22			49.68
		2		456	24			48.86
70-71	71	2	27	458	2	55.5	52.96	58.16
		2		460	4	58.5	55.6	60.3
		2		462	6	61.57	58.24	62.8
		2		464	8	66.92	58.24	65.82
		2		466	10	70.13	59.56	69.98
		2		468	12	74.83	60.88	74.38
		2		470	14	78.46	66.67	78.35
		2		472	16	82.09	65.18	83.06
		2		474	18	84.54	63.69	83.7
		2		476	20	80.88	66.67	84.96
		2		478	22	76.04	71.14	86.22
		2		480	24	72.41	74.12	86.86
70-71	71	2	28	482	2			88.12	5.84
		2		484	4			89.47	6.01
		2		486	6			90.82	6.01
		2		488	8			91.49	6.69
		2		490	10			85.59	7.41
		2		492	12			79.5	8.04
		2		494	14			74.38	8.67
		2		496	16			69.46	9.4
		2		498	18			70.5	8.88
		2		500	20			71.61	8.46
		2		502	22			73.27	8.04
		2		504	24			74.37	7.62
70-71	71	2	29	506	2			76.05
		2		508	4			77.2
		2		510	6			78.35
		2		512	8			79.5
		2		514	10			73.83
		2		516	12			67.9
		2		518	14			62.3
		2		520	16			57.73
		2		522	18			58.59
		2		524	20			59.87
		2		526	22			60.8
		2		528	24			62.3
70-71	71	2	30	530	2			63.3
		2		532	4			64.3
		2		534	6			65.82
		2		536	8			66.86
		2		538	10			68.42
		2		540	12			60.3
		2		542	14			57.3
		2		544	16			54.31
		2		546	18			55.17
		2		548	20			55.59
		2		550	22			56.02
		2		552	24			56.88
70-71	71	3	11	554	2			57.73
		3		556	4			59.02
		3		558	6			60.8
		3		560	8			62.8
		3		562	10			59.02
		3		564	12			55.59
		3		566	14			52.18
		3		568	16			48.86
		3		570	18			50.1
		3		572	20			51.34
		3		574	22			53.03
		3		576	24			54.31
70-71	71	3	12	578	2			55.59
		3		580	4			57.3
		3		582	6			58.59
		3		584	8			59.87
		3		586	10			56.88
		3		588	12			53.88
		3		590	14			50.92
		3		592	16			48.03
		3		594	18			48.86
		3		596	20			49.68
		3		598	22			50.1
		3		600	24			50.92
70-71	71	3	14	602	2			49.68
		3		604	4			50.51
		3		606	6			51.34
		3		608	8			52.18
		3		610	10			49.68
		3		612	12			46.82
		3		614	14			44.02
		3		616	16			41.76
		3		618	18			42.13
		3		620	20			42.5
		3		622	22			42.88
		3		624	24			43.25
70-71	71	5	19	626	2		5.54
		5		628	4		5.54
		5		630	6		5.54
		5		632	8		5.54
		5		634	10		5.88
		5		636	12		5.88
		5		638	14		5.88
		5		640	16		5.88
		5		642	18		5.88
		5		643	19		33.58
		5		644	20		37.3
		5		646	22		11.66
		5		648	24		9.36
70-71	71	5	20	650	2			5.1
		5		652	4			5.4
		5		654	6			5.85
		5		656	8			7.12
		5		658	10			8.24
		5		660	12			8.72
		5		662	14			9.04
		5		664	16			9.37
		5		666	18			9.2
		5		668	20			8.24
		5		670	22			8.24
		5		672	24			8.24
71-72	71	8	16	674	2	11.82	7.58	9.19	3.25
		8		676	4	13.99	16.72	10.21	3.58
		8		678	6	15.9	14	11.91	3.92
		8		680	8	18.26	16.72	12.59	4.26
		8		682	10	18.64	22.92	14.15	4.15
		8		684	12	19.02	24.02	16.81	4.15
		8		686	14	19.02	20.73	19.25	5.97
		8		688	16	19.4	18.54	18	5.84
		8		690	18	17.88	18.54	17.27	5.58
		8		692	20	16.54	19.64	16.81	5.34
		8		694	22	15.26	20.73	16.81	5.22
		8		696	24	13.99	20.73	15.2	4.98
71-72	71	8	17	698	2		22.38
		8		700	4		20.18
		8		702	6		18.54
		8		704	8		16.72
		8		706	10		14.91
		8		708	12		14
		8		710	14		13.15
		8		712	16		12.3
		8		714	18		11.88
		8		716	20		11.45
		8		718	22		11.02
		8		720	24		10.6
71-72	71	8	21	722	2	14.94	12.3	9.87
		8		724	4	16.54	12.3	10.04
		8		726	6	18.26	15.82	10.38
		8		728	8	20.16	19.64	11.4
		8		730	10	16.86	17.18	14.57
		8		732	12	14.3	21.28	13.94
		8		734	14	11.82	22.92	13.52
		8		736	16	9.7	19.64	10.89
		8		738	18	9.45	17.63	10.72
		8		740	20	9.45	15.82	10.55
		8		742	22	9.45	14.91	10.55
		8		744	24	9.2	14	10.38
71-72	71	9	1	746	2	9.95	7.22
		9		748	4	10.95	7.58
		9		750	6	12.13	7.94
		9		752	8	13.06	9.39
		9		754	10	13.37	12.3
		9		756	12	13.68	11.88
		9		758	14	13.99	13.58
		9		760	16	14.3	17.18
		9		762	18	13.68	16.27
		9		764	20	13.06	15.82
		9		766	22	12.13	14.45
		9		768	24	11.51	16.27
71-72	71	9	2	770	2		16.27	18.5
		9		772	4		18.09	19.5
		9		774	6		22.92	20.5
		9		776	8		21.28	21.25
		9		778	10		18.54	19.5
		9		780	12		16.72	18
		9		782	14		14.45	16.58
		9		784	16		12.72	15.2
		9		786	18		11.02	15.2
		9		788	20		10.18	14.99
		9		790	22		10.18	14.99
		9		792	24		10.18	14.78
71-72	71	9	25	794	2			13.1
		9		796	4			14.78
		9		798	6			15.66
		9		800	8			17.5
		9		802	10			18.5
		9		804	12			16.58
		9		806	14			16.12
		9		808	16			15.66
		9		810	18			15.66
		9		812	20			15.2
		9		814	22			15.2
		9		816	24			15.2
71-72	71	12	8	818	2	5.2
		12		820	4	5.2
		12		822	6	5.45
		12		824	8	6.72
		12		826	10	7.82
		12		828	12	7.82
		12		830	14	8.7
		12		832	16	9.2
		12		834	18	9.45
		12		836	20	9.2
		12		838	22	8.95
		12		840	24	8.95
71-72	71	12	12	842	2	9.45
		12		844	4	8.95
		12		846	6	8.48
		12		848	8	12.44
		12		850	10	13.68
		12		852	12	14.62
		12		854	14	15.9
		12		856	16	15.58
		12		858	18	14.94
		12		860	20	13.99
		12		862	22	13.06
		12		864	24	12.44
71-72	72	1	8	866	2			22
		1		868	4			27.8
		1		870	6			25.4
		1		872	8			23.37
		1		874	10			22
		1		876	12			20.5
		1		878	14			19.75
		1		880	16			19.25
		1		882	18			18.75
		1		884	20			18.75
		1		886	22			19.75
		1		888	24			22.5
71-72	72	1	9	890	2			26.6
		1		892	4			29.33
		1		894	6			28.1
		1		896	8			25.4
		1		898	10			23.37
		1		900	12			22
		1		902	14			20.5
		1		904	16			19.75
		1		906	18			19.5
		1		908	20			19.25
		1		910	22			20
		1		912	24			22.5
71-72	72	1	10	914	2			27.2
		1		916	4			32.49
		1		918	6			31.19
		1		920	8			27.2
		1		922	10			23.66
		1		924	12			21.75
		1		926	14			20.75
		1		928	16			20.25
		1		930	18			19.75
		1		932	20			19.75
		1		934	22			20.5
		1		936	24			22
71-72	72	1	11	938	2			24.82
		1		940	4			28.1
		1		942	6			28.1
		1		944	8			26.3
		1		946	10			23.66
		1		948	12			22
		1		950	14			21
		1		952	16			20.25
		1		954	18			19.75
		1		956	20			20
		1		958	22			20.5
		1		960	24			21.5
71-72	72	1	13	962	2			21.5	8.6
		1		964	4			22.25	8.42
		1		966	6			22.79	8.42
		1		968	8			22.79	8.25
		1		970	10			23.08	8.94
		1		972	12			23.08	9.64
		1		974	14			23.08	10.44
		1		976	16			23.08	11.04
		1		978	18			23.66	11.44
		1		980	20			25.11	11.88
		1		982	22			26	12.36
		1		984	24			27.8	12.6
71-72	72	1	14	986	2			30.57
		1		988	4			36.55
		1		990	6			37.25
		1		992	8			34.14
		1		994	10			30.57
		1		996	12			28.4
		1		998	14			26.6
		1		1000	16			25.11
		1		1002	18			24.53
		1		1004	20			23.95
		1		1006	22			23.95
		1		1008	24			24.82
71-72	72	1	18	1010	2	18.26	21.28	23.66
		1		1012	4	19.4	21.83	24.82
		1		1014	6	20.54	21.83	25.7
		1		1016	8	21.74	20.73	25.4
		1		1018	10	22.18	21.28	24.82
		1		1020	12	22.62	22.92	25.11
		1		1022	14	23.06	25.15	25.7
		1		1024	16	23.5	27.98	28.1
		1		1026	18	23.94	30.39	31.19
		1		1028	20	28.58	29.68	35.15
		1		1030	22	33.92	29.11	37.25
		1		1032	24	39.8	30.39	37.25
71-72	72	1	19	1034	2	52.35	30.39	37.95
		1		1036	4	59.52	29.68	40.15
		1		1038	6	68.84	29.68	38.67
		1		1040	8	70.86	34.63	36.55
		1		1042	10	65.81	46.2	39.78
		1		1044	12	56	57	50.4
		1		1046	14	50.16	59	57
		1		1048	16	33.92	83.25	66.79
		1		1049	17		98.2
		1		1050	18	30.5	83.25	80.1
		1		1052	20	28.1	53	103
		1		1054	22	25.7	39.07	128.9
		1		1056	24	23.94	33.92	113.9
71-72	72	1	20	1058	2			83.8
		1		1060	4			61.04
		1		1062	6			45.6
		1		1064	8			39.78
		1		1066	10			36.2
		1		1068	12			33.48
		1		1070	14			31.83
		1		1072	16			30.26
		1		1074	18			29.02
		1		1076	20			28.4
		1		1078	22			28.71
		1		1080	24			29.64
71-72	72	1	22	1082	2	26.18	35.34	36.2
		1		1084	4	27.62	38.3	39.78
		1		1086	6	29.06	33.92	47.76
		1		1088	8	30.5	31.09	54.08
		1		1090	10	31.07	30.39	53.16
		1		1092	12	26.66	32.51	45.6
		1		1094	14	32.78	33.92	42.4
		1		1096	16	33.35	39.07	43.2
		1		1098	18	31.07	43.72	45.6
		1		1099	19		44.5
		1		1100	20	29.06	43.72	50.4
		1		1102	22	27.62	39.85	57
		1		1104	24	25.7	35.34	62.08
71-72	72	1	23	1106	2			61.56
		1		1108	4			55.5
		1		1110	6			49.52
		1		1112	8			44.4
		1		1114	10			40.52
		1		1116	12			37.6
		1		1118	14			35.85
		1		1120	16			35.5
		1		1122	18			33.48
		1		1124	20			32.82
		1		1126	22			32.49
		1		1128	24			32.16
71-72	72	1	28	1130	2			35.85
		1		1132	4			39.41
		1		1134	6			42
		1		1136	8			42
		1		1138	10			41.26
		1		1140	12			40.15
		1		1142	14			38.3
		1		1144	16			36.9
		1		1146	18			35.5
		1		1148	20			34.47
		1		1150	22			33.81
		1		1152	24			33.15
71-72	72	1	30	1154	2	25.26
		1		1156	4	24.82
		1		1158	6	24.38
		1		1160	8	27.62
		1		1162	10	28.1
		1		1164	12	30.5
		1		1166	14	33.35
		1		1168	16	36.8
		1		1170	18	39.2
		1		1172	20	39.8
		1		1174	22	40.4
		1		1176	24	41
71-72	72	1	31	1178	2	37.4	43.72	43.6
		1		1180	4	40.4	43.72	48.64
		1		1182	6	41	43.72	52.7
		1		1184	8	41.6	43.72	56
		1		1186	10	44.15	44.5	57.5
		1		1188	12	46.75	47.05	57.5
		1		1190	14	48.7	50.45	58.5
		1		1192	16	51.62	50.45	61.04
		1		1194	18	48.7	56	64.68
		1		1196	20	45.45	66.6	68.91
		1		1198	22	42.85	71.4	72.9
		1		1200	24	41	69	80.1
71-72	72	2	1	1202	2		58	92.25
		2		1204	4		51.3	103.75
		2		1206	6		47.9	109
		2		1208	8		44.5	100.75
		2		1210	10		42.95	85.75
		2		1212	12		40.62	72.9
		2		1214	14		39.07	63.64
		2		1216	16		38.3	58.5
		2		1218	18		36.75	54.54
		2		1220	20		36.04	51.78
		2		1222	22		36.04	49.52
		2		1224	24		36.04	48.2
71-72	72	2	6	1226	2		27.98
		2		1228	4		29.68
		2		1230	6		36.04
		2		1231	7		36.75
		2		1232	8		36.04
		2		1234	10		31.8
		2		1236	12		29.68
		2		1238	14		28.55
		2		1240	16		26.85
		2		1242	18		25.72
		2		1244	20		25.75
		2		1246	22		25.15
		2		1248	24		25.15
71-72	72	2	22	1250	2	33.92	41.38	38.3	11.24
		2		1252	4	52.35	42.82	40.52	11.24
		2		1254	6	63.04	44.28	42	11.44
		2		1256	8	70.86	70.34	43.6	11.64
		2		1258	10	76.03	61.6	49.52	14.87
		2		1260	12	67.83	71.46	59	18.47
		2		1262	14	60.4	93.5	68.38	23.39
		2		1263	15		102.6
		2		1264	16	60.4	99.5	81.3	29.1
		2		1266	18	52.35	79.85	97	30.9
		2		1267	19		122.1
		2		1268	20	51.62	109	143	32.7
		2		1269	21		102.6
		2		1270	22	53.08	112.2	167.4	33.9
		2		1272	24	53.81	176.85	185.9	36.16
71-72	72	2	23	1274	2	30.5	188.55	239	38.65
		2		1276	4	38.6	230	239	41.14
		2		1277	5		245.61
		2		1278	6	46.75	222	239	43.9
		2		1280	8	56	190.5	336.24	47.22
		2		1282	10	58.64	130.6	336.24	29.1
		2		1284	12	60.4	92	239	36.16
		2		1286	14	61.28	78.62	207.5	24.23
		2		1288	16	63.04	73.7	194	20.04
		2		1290	18	64.8	71.46	137	19.07
		2		1292	20	80.55	70.34	128	19.07
		2		1294	22	127.3	68.1	128	18.42
		2		1296	24	201.64	66.98	123.5	16.8
71-72	72	2	24	1298	2			118.15
		2		1300	4			117.3
		2		1302	6			115.6
		2		1304	8			114.75
		2		1306	10			99.25
		2		1308	12			85.75
		2		1310	14			73.5
		2		1312	16			62.6
		2		1314	18			63.012
		2		1316	20			64.16
		2		1318	22			64.68
		2		1320	24			65.2
71-72	72	3	11	1322	2	44.86
		3		1324	4	46.24
		3		1326	6	47.62
		3		1328	8	49
		3		1330	10	49.8
		3		1332	12	49.8
		3		1334	14	50.6
		3		1336	16	50.6
		3		1338	18	50.6
		3		1340	20	50.6
		3		1342	22	49.8
		3		1344	24	49.8
72-73	72	8	20	1346	2	12.3	11.92	25.36
		8		1348	4	13.62	14.68	27.84
		8		1350	6	14.5	21.3	29.92
		8		1351	7		25.99
		8		1352	8	18.82	23.98	37.8
		8		1354	10	26.41	20.16	45.4
		8		1356	12	27.04	17.88	41.52
		8		1358	14	38.55	16.74	40.28
		8		1360	16	35.55	15.6	34.32
		8		1362	18	34.15	19.02	31.48
		8		1364	20	30.25	21.97	30.44
		8		1366	22	26.41	21.97	28.88
		8		1368	24	23.26	22.64	27.84
72-73	72	9	3	1370	2	12.26	9.48	15.12
		9		1372	4	19.35	10.24	15.12
		9		1374	6	22	11	14.8
		9		1376	8	22.63	11.46	14.8
		9		1378	10	29.6	12.38	16.72
		9		1380	12	34.8	13.76	18.8
		9		1382	14	60.12	16.74	21.2
		9		1384	16	58.4	21.97	23.44
		9		1386	18	58.4	31.85	24.4
		9		1388	20	51.84	35.7	25.84
		9		1390	22	47.04	35.7	27.32
		9		1392	24	40.8	33.39	28.36
72-73	72	9	4	1394	2		29.54	29.4
		9		1396	4		28	30.96
		9		1398	6		28	32.58
		9		1400	8		28	33.74
		9		1402	10		25.32	29.4
		9		1404	12		21.97	25.84
		9		1406	14		19.59	22.48
		9		1408	16		17.88	19.2
		9		1410	18		16.74	19.6
		9		1412	20		16.17	20.4
		9		1414	22		15.6	20.8
		9		1416	24		15.14	21.2
72-73	72	9	5	1418	2	5.6
		9		1420	4	5
		9		1422	6	4.4
		9		1424	8	4.6
		9		1426	10	5
		9		1428	12	5.8
		9		1430	14	11.45
		9		1432	16	9.89
		9		1434	18	9.5
		9		1436	20	8.57
		9		1438	22	7.64
		9		1440	24	6.71
72-73	72	10	12	1442	2	3.36	8.72	13.3
		10		1444	4	3.4	8.72	13.6
		10		1446	6	3.5	8.72	13.6
		10		1448	8	7.02	8.72	13.9
		10		1450	10	13.96	9.1	14.2
		10		1452	12	24.85	9.48	14.2
		10		1454	14	38.8	10.24	14.8
		10		1456	16	61.95	12.84	15.44
		10		1458	18	74.55	17.31	18
		10		1460	20	73.5	27.33	24.88
		10		1462	22	72.45	46.64	32
		10		1464	24	71.4	62.64	44
		10		1465	1		73.32
72-73	72	10	13	1466	2		72.1	55.5
		10		1468	4		58.16	65.5
		10		1470	6		43.71	71.6
		10		1472	8		34.93	64.9
		10		1474	10		30.31	51
		10		1476	12		25.99	39.04
		10		1478	14		23.31	33.74
		10		1480	16		20.73	29.92
		10		1482	18		19.59	27.32
		10		1484	20		20.16	25.36
		10		1486	22		21.97	25.36
		10		1488	24		23.31	26.8
72-73	72	12	7	1490	2	5.6
		12		1492	4	5.4
		12		1494	6	5.4
		12		1496	8	5.6
		12		1498	10	6.2
		12		1500	12	6.4
		12		1502	14	13.4
		12		1504	16	13.01
		12		1506	18	13.01
		12		1508	20	12.62
		12		1510	22	12.62
		12		1512	24	12.23
72-73	73	1	1	1514	2	7.02		13.6
		1		1516	4	7.02		14.2
		1		1518	6	7.02		14.8
		1		1520	8	7.02		15.12
		1		1522	10	7.33		15.76
		1		1524	12	13.96		16.4
		1		1526	14	19		18.4
		1		1528	16	23.55		21.6
		1		1530	18	23.55		21.6
		1		1532	20	20.95		20.8
		1		1534	22	19		19.6
		1		1536	24	16.76		18.8
72-73	73	1	11	1538	2	23.64
		1		1540	4	24.8
		1		1542	6	26.1
		1		1544	8	27.4
		1		1546	10	28.7
		1		1548	12	30
		1		1550	14	30.7
		1		1552	16	32.1
		1		1554	18	32.1
		1		1556	20	33.5
		1		1558	22	34.2
		1		1560	24	40.2
72-73	73	1	12	1562	2	39.7	28.77	36.06	10.97
		1		1564	4	41.5	28.77	36.64	10.97
		1		1566	6	42.4	28.77	36.64	11.15
		1		1568	8	44.42	28.77	36.64	11.15
		1		1570	10	49.47	31.85	37.8	12.05
		1		1572	12	92.4	36.59	40.28	12.95
		1		1574	14	114.3	49.7	46.1	13.9
		1		1576	16	84	69.66	58.5	15.9
		1		1578	18	81.9	97.5	91.5	18.08
		1		1580	20	87.15	92.3	143.7	19.2
		1		1582	22	85.05	87.16	138.5	14.85
		1		1584	24	37.9	87.16	136	11.15
72-73	73	1	13	1586	2	38.8	81	161.25	11.15
		1		1588	4	37.2	75.76	168	11.15
		1		1590	6	35.7	69.66	141	11.15
		1		1592	8	35	59.28	105.5	11.15
		1		1594	10	34.2	48.68	89.5	10.07
		1		1596	12	32.8	42.82	75	9
		1		1598	14	32.1	39.26	62.5	7.95
		1		1600	16	30.7	36.59	51	6.96
		1		1602	18	30	34.16	48.9	6.96
		1		1604	20	28.7	32.62	46.8	6.96
		1		1606	22	28	32.62	44.7	6.96
		1		1608	24	33.5	31.08	43.38	6.96
72-73	73	2	7	1610	2			40.9
		2		1612	4			45.4
		2		1614	6			55.5
		2		1616	8			54
		2		1618	10			51
		2		1620	12			47.5
		2		1622	14			44
		2		1624	16			41.52
		2		1626	18			38.42
		2		1628	20			37.22
		2		1630	22			37.22
		2		1632	24			38.42
72-73	73	2	9	1634	2	24.85
		2		1636	4	24.2
		2		1638	6	24.2
		2		1640	8	23.55
		2		1642	10	22.9
		2		1644	12	22.9
		2		1646	14	22.25
		2		1648	16	21.6
		2		1650	18	21.6
		2		1652	20	36.1
		2		1654	22	49.47
		2		1656	24	108.8
72-73	73	2	10	1658	2	112.1	48.68	55.5	8.82
		2		1660	4	119.6	62.64	61.7	9.71
		2		1662	6	125.81	76.98	68.2	10.46
		2		1664	8	119.6	91	96.7	9.71
		2		1666	10	116.5	93.6	128.5	9.18
		2		1668	12	96.7	100.1	161.25	8.48
		2		1669	13		126.92
		2		1670	14	85.05	125.56	173.8	6.8
		2		1672	16	82.95	96.2	190	6.32
		2		1674	18	72.45	78.2	213.19	6.32
		2		1676	20	67.2	69.66	182.5	6.16
		2		1678	22	63	66	128.5	6.16
		2		1680	24	57.75	62.64	96.7	6
72-73	73	2	11	1682	2			111
		2		1684	4			97.8
		2		1686	6			85.5
		2		1688	8			75
		2		1690	10			69.9
		2		1692	12			65.7
		2		1694	14			60.9
		2		1696	16			57
		2		1698	18			56.25
		2		1700	20			55.5
		2		1702	22			54.75
		2		1704	24			54
72-73	73	2	14	1706	2			36.64
		2		1708	4			36.64
		2		1710	6			36.64
		2		1712	8			36.64
		2		1714	10			36.64
		2		1716	12			36.64
		2		1718	14			36.64
		2		1720	16			37.8
		2		1722	18			44
		2		1724	20			52.5
		2		1726	22			58.5
		2		1728	24			54.75
72-73	73	4	7	1730	2			12.1
		4		1732	4			13
		4		1734	6			13.9
		4		1736	8			14.8
		4		1738	10			17.04
		4		1740	12			19.6
		4		1742	14			22.48
		4		1744	16			25.36
		4		1746	18			24.4
		4		1748	20			23.92
		4		1750	22			22.96
		4		1752	24			22
72-73	73	6	18	1754	2			2.8
		6		1756	4			4.28
		6		1758	6			5.88
		6		1760	8			7.48
		6		1762	10			6.84
		6		1764	12			6.2
		6		1766	14			5.56
		6		1768	16			5.08
		6		1770	18			5.08
		6		1772	20			4.92
		6		1774	22			4.76
		6		1776	24			4.76
73-74	73	8	13	1778	2	11.61
		8		1780	4	11.32
		8		1782	6	11.32
		8		1784	8	11.91
		8		1786	10	13.73
		8		1788	12	13.73
		8		1790	14	16.95
		8		1792	16	17.65
		8		1794	18	17.3
		8		1796	20	16.6
		8		1798	22	15.9
		8		1800	24	15.59
73-74	73	9	2	1802	2		8.08
		9		1804	4		8.08
		9		1806	6		8.74
		9		1808	8		9.08
		9		1810	10		10.4
		9		1812	12		17.08
		9		1814	14		20.05
		9		1816	16		18.95
		9		1818	18		17.08
		9		1820	20		17.96
		9		1822	22		17.08
		9		1824	24		14.88
73-74	73	9	7	1826	2		7.42	8.03
		9		1828	4		7.42	8.03
		9		1830	6		7.75	8.03
		9		1832	8		7.75	8.03
		9		1834	10		8.41	10.16
		9		1836	12		9.41	12.49
		9		1838	14		11.48	15.61
		9		1840	16		20.05	18.76
		9		1842	18		29.52	26.86
		9		1844	20		39.36	37.3
		9		1846	22		44.16	44.15
		9		1848	24		40.32	53.4
73-74	73	9	8	1850	2		30.15	49.65
		9		1852	4		22.8	37.62
		9		1854	6		18.4	24.8
		9		1856	8		15.76	20.8
		9		1858	10		14	19.08
		9		1860	12		12.56	16.93
		9		1862	14		11.48	15.42
		9		1864	16		11.12	13.62
		9		1866	18		10.4	13.26
		9		1868	20		10.07	12.9
		9		1870	22		9.74	12.6
		9		1872	24		9.74	12.3
73-74	74	1	5	1874	2		14	7.21
		1		1876	4		14.88	7.48
		1		1878	6		16.2	7.75
		1		1880	8		17.52	8.02
		1		1882	10		17.52	8.29
		1		1884	12		17.08	8.29
		1		1886	14		16.64	8.83
		1		1888	16		16.64	9.37
		1		1890	18		15.76	11.7
		1		1892	20		14.44	14.7
		1		1894	22		13.64	12.9
		1		1896	24		12.56	11.7
73-74	74	1	14	1898	2		9.08	9.1
		1		1900	4		10.07	9.37
		1		1902	6		11.48	9.91
		1		1904	8		13.64	10.81
		1		1906	10		16.2	12.6
		1		1908	12		18.95	14.7
		1		1910	14		18.4	18.65
		1		1912	16		17.96	20.37
		1		1914	18		17.52	20.37
		1		1916	20		18.95	19.08
		1		1918	22		22.25	19.94
		1		1920	24		25.15	21.8
73-74	74	1	15	1922	2		25.77	24.8
		1		1924	4		27.02	29.22
		1		1926	6		31.8	30.93
		1		1928	8		32.62	34.9
		1		1930	10		37.58	39.74
		1		1932	12		32.62	49.77
		1		1934	14		29.52	46.33
		1		1936	16		27.02	43.34
		1		1938	18		23.35	38.3
		1		1940	20		21.15	33.54
		1		1942	22		19.5	28.65
		1		1944	24		18.4	24.8
73-74	74	1	16	1946	2		17.96	23.3
		1		1948	4		17.08	20.8
		1		1950	6		16.64	20.37
		1		1952	8		16.2	19.94
		1		1954	10		15.76	19.08
		1		1956	12		15.32	18.65
		1		1958	14		14.88	17.36
		1		1960	16		14.44	16.5
		1		1962	18		14.44	16.14
		1		1964	20		13.64	15.42
		1		1966	22		13.64	15.06
		1		1968	24		13.64	14.7
73-74	74	1	18	1970	2	9.13
		1		1972	4	8.66
		1		1974	6	8.2
		1		1976	8	8.66
		1		1978	10	8.9
		1		1980	12	9.83
		1		1982	14	11.91
		1		1984	16	11.61
		1		1986	18	11.91
		1		1988	20	11.61
		1		1990	22	11.32
		1		1992	24	10.72
73-74	74	1	20	1994	2	10.42
		1		1996	4	10.13
		1		1998	6	9.83
		1		2000	8	10.42
		1		2002	10	10.72
		1		2004	12	13.11
		1		2006	14	15.59
		1		2008	16	15.28
		1		2010	18	15.59
		1		2012	20	15.9
		1		2014	22	15.59
		1		2016	24	15.28
73-74	74	1	21	2018	2	14.97
		1		2020	4	14.66
		1		2022	6	14.35
		1		2024	8	14.97
		1		2026	10	15.59
		1		2028	12	16.95
		1		2030	14	19.78
		1		2032	16	19.78
		1		2034	18	20.17
		1		2036	20	22.86
		1		2038	22	25.38
		1		2040	24	27.94
73-74	74	1	22	2042	2	30.6	12.92	15.78
		1		2044	4	33.51	14	19.51
		1		2046	6	37.2	16.64	24.3
		1		2048	8	38.86	20.6	26.37
		1		2050	10	41.08	22.25	26.94
		1		2052	12	43.35	21.7	28.65
		1		2054	14	46.95	22.8	32.18
		1		2056	16	48.15	24.52	36.26
		1		2058	18	48.75	27.65	41.18
		1		2060	20	43.95	29.52	43.34
		1		2062	22	39.98	30.15	52.97
		1		2064	24	35.62	35.92	69.38
		1		2065	1		41.28
73-74	74	1	23	2066	2		44.16	61
		1		2067	3		47.04
		1		2068	4		45.12	50.48
		1		2069	5		41.28
		1		2070	6		35.92	42.62
		1		2072	8		30.15	36.94
		1		2074	10		27.02	34.22
		1		2076	12		25.15	31.5
		1		2078	14		23.9	29.22
		1		2080	16		22.8	27.51
		1		2082	18		21.7	25.8
		1		2084	20		20.6	24.3
		1		2086	22		20.05	22.8
		1		2088	24		19.5	22.3
73-74	74	1	29	2090	2	13.73
		1		2092	4	13.11
		1		2094	6	12.8
		1		2096	8	13.11
		1		2098	10	14.04
		1		2100	12	14.97
		1		2102	14	16.25
		1		2104	16	16.25
		1		2106	18	16.6
		1		2108	20	37.75
		1		2110	22	65.26
		1		2112	24	79
73-74	74	1	30	2114	2	91.45	16.2	18.65
		1		2116	4	104.14	16.2	27.51
		1		2118	6	107.02	17.96	36.26
		1		2120	8	100.06	20.6	41.18
		1		2122	10	93.3	23.35	57.4
		1		2124	12	86.88	28.28	103.4
		1		2126	14	81.62	31.8	137
		1		2128	16	75.7	47.04	154.25
		1		2130	18	70.75	89.2	160.93
		1		2132	20	65.26	117.81	154.25
		1		2134	22	59.94	107	142.75
		1		2136	24	55.5	99.88	129.02
73-74	74	1	31	2138	2		99.88	111.17
		1		2140	4		92.76	93.59
		1		2142	6		78.21	79.13
		1		2144	8		67.98	68.44
		1		2146	10		58.53	62.8
		1		2148	12		52.68	54.7
		1		2150	14		47.04	49.77
		1		2152	16		41.28	42.62
		1		2154	18		37.58	41.9
		1		2156	20		35.1	41.9
		1		2158	22		32.62	41.18
		1		2160	24		29.52	40.46
73-74	74	2	1	2162	2	25.8	28.9
		2		2164	4	22.1	27.65
		2		2166	6	18.7	27.65
		2		2168	8	19.78	28.9
		2		2170	10	21.32	28.28
		2		2172	12	22.1	24.6
		2		2174	14	24.52	24.6
		2		2176	16	25.38	25.15
		2		2178	18	26.22	24.52
		2		2180	20	25.38	23.9
		2		2182	22	24.95	23.9
		2		2184	24	24.1	23.35
73-74	74	2	2	2186	2	22.86
		2		2188	4	22.1
		2		2190	6	21.71
		2		2192	8	23.25
		2		2194	10	24.52
		2		2196	12	26.22
		2		2198	14	28.83
		2		2200	16	28.83
		2		2202	18	29.27
		2		2204	20	29.27
		2		2206	22	29.27
		2		2208	24	29.72
73-74	74	2	3	2210	2	28.83
		2		2212	4	28.83
		2		2214	6	28.83
		2		2216	8	29.72
		2		2218	10	31.04
		2		2220	12	33.51
		2		2222	14	37.75
		2		2224	16	36.67
		2		2226	18	39.98
		2		2228	20	41.08
		2		2230	22	41.64
		2		2232	24	42.75
73-74	74	2	4	2234	2		22.25	38.05
		2		2236	4		22.8	44.92
		2		2238	6		24.52	57
		2		2240	8		27.02	72.92
		2		2242	10		29.52	85.8
		2		2244	12		35.1	104.1
		2		2246	14		42.24	120.6
		2		2248	16		47.04	120.6
		2		2250	18		52.68	117
		2		2252	20		59.7	109.85
		2		2254	22		55.02	94.9
		2		2256	24		52.68	99.5
73-74	74	2	5	2258	2		51.51	68.84
		2		2260	4		45.12	58.96
		2		2262	6		35.92	53.4
		2		2264	8		32.62	49.8
		2		2266	10		29.52	48
		2		2268	12		28.28	45.69
		2		2270	14		27.65	44.15
		2		2272	16		24.6	41.84
		2		2274	18		25.77	40.3
		2		2276	20		25.15	38.8
		2		2278	22		24.52	38.05
		2		2280	24		23.9	37.3
73-74	74	2	8	2282	2	17.65
		2		2284	4	17.4
		2		2286	6	16.95
		2		2288	8	17.65
		2		2290	10	18.7
		2		2292	12	21.32
		2		2294	14	23.25
		2		2296	16	25.38
		2		2298	18	27.94
		2		2300	20	26.65
		2		2302	22	25.8
		2		2304	24	24.52
73-74	74	2	9	2306	2	23.25
		2		2308	4	22.48
		2		2310	6	21.71
		2		2312	8	22.48
		2		2314	10	24.95
		2		2316	12	27.08
		2		2318	14	29.72
		2		2320	16	35.04
		2		2322	18	38.31
		2		2324	20	41.64
		2		2326	22	34.56
		2		2328	24	32.46
73-74	74	2	11	2330	2	28.39
		2		2332	4	27.94
		2		2334	6	27.08
		2		2336	8	27.5
		2		2338	10	28.39
		2		2340	12	30.6
		2		2342	14	31.49
		2		2344	16	32.98
		2		2346	18	33.51
		2		2348	20	35.09
		2		2350	22	37.2
		2		2352	24	38.86
73-74	74	2	12	2354	2	39.42	27.65	46.46
		2		2356	4	42.75	27.65	48
		2		2358	6	44.55	29.52	49.8
		2		2360	8	45.15	31.8	53.4
		2		2362	10	46.95	33.45	55.2
		2		2364	12	47.55	33.45	58.96
		2		2366	14	48.15	35.95	66.8
		2		2368	16	49.42	36.75	72.92
		2		2370	18	54.15	38.4	74.96
		2		2372	20	50.1	40.32	77
		2		2374	22	46.35	48	81.4
		2		2376	24	43.35	50.34	88
73-74	74	2	13	2378	2	40.53	53.85	92.6
		2		2380	4	37.2	53.85	93.75
		2		2382	6	34.04	58.53	93.75
		2		2384	8	34.56	63.84	92.6
		2		2386	10	38.31	65.22	89.15
		2		2388	12	39.98	63.84	82.5
		2		2390	14	44.55	62.46	78.1
		2		2392	16	49.42	62.46	71.9
		2		2394	18	48.15	58.53	68.84
		2		2396	20	47.55	55.02	66.8
		2		2398	22	46.95	52.68	70.88
		2		2400	24	45.75	48	77
73-74	74	2	14	2402	2	45.15	47.04
		2		2404	4	44.55	48
		2		2406	6	43.95	53.85
		2		2408	8	45.75	58.53
		2		2410	10	46.95	61.08
		2		2412	12	50.1	59.7
		2		2414	14	53.48	57.36
		2		2416	16	57.72	55.02
		2		2418	18	58.46	51.51
		2		2420	20	56.24	49.17
		2		2422	22	54.15	47.04
		2		2424	24	51.45	48
73-74	74	2	15	2426	2	50.1	49.17	96.05
		2		2428	4	48.15	51.51	101.8
		2		2430	6	45.75	53.85	96.05
		2		2432	8	48.15	61.08	90.3
		2		2434	10	50.1	66.6	83.6
		2		2435	11		72.12
		2		2436	12	52.12	67.98	78.1
		2		2438	14	53.48	63.84	72.92
		2		2440	16	56.98	58.53	69.86
		2		2442	18	59.2	53.85	65.82
		2		2444	20	57.72	51.51	62.88
		2		2446	22	56.24	49.17	62.88
		2		2448	24	54.82	47.04	64.84
73-74	74	2	16	2450	2		49.17
		2		2452	4		51.51
		2		2454	6		49.17
		2		2456	8		47.04
		2		2458	10		49.17
		2		2460	12		49.17
		2		2462	14		47.04
		2		2464	16		48
		2		2466	18		50.34
		2		2468	20		52.68
		2		2470	22		55.02
		2		2472	24		57.36
73-74	74	2	21	2474	2	76.52
		2		2476	4	85.12
		2		2478	6	94.22
		2		2480	8	95.15
		2		2482	10	97
		2		2484	12	98.02
		2		2486	14	99.04
		2		2488	16	101.08
		2		2490	18	102.1
		2		2492	20	100.06
		2		2494	22	99.04
		2		2496	24	97
73-74	74	2	23	2498	2	31.49
		2		2500	4	28.83
		2		2502	6	26.22
		2		2504	8	27.94
		2		2506	10	29.72
		2		2508	12	39.98
		2		2510	14	45.75
		2		2512	16	53.48
		2		2514	18	68.4
		2		2516	20	59.94
		2		2518	22	52.8
		2		2520	24	46.35
73-74	74	2	28	2522	2	32.98
		2		2524	4	31.93
		2		2526	6	31.04
		2		2528	8	33.51
		2		2530	10	36.15
		2		2532	12	38.86
		2		2534	14	41.64
		2		2536	16	44.55
		2		2538	18	47.55
		2		2540	20	46.35
		2		2542	22	45.15
		2		2544	24	43.35
73-74	74	2	30	2546	2		30.15
		2		2548	4		30.98
		2		2550	6		30.98
		2		2552	8		30.98
		2		2554	10		30.15
		2		2556	12		30.15
		2		2558	14		28.9
		2		2560	16		28.28
		2		2562	18		27.02
		2		2564	20		26.4
		2		2566	22		28.9
		2		2567	23		50.34
		2		2568	24		46.08
73-74	74	2	31	2570	2			48
		2		2572	4			64.84
		2		2574	6			49.8
		2		2576	8			44.92
		2		2578	10			44.92
		2		2580	12			41.84
		2		2582	14			40.3
		2		2584	16			38.8
		2		2586	18			38.05
		2		2588	20			37.3
		2		2590	22			35.8
		2		2592	24			35.8
73-74	74	3	13	2594	2	36.15	28.9	26.2
		3		2596	4	37.75	28.9	26.2
		3		2598	6	39.42	29.52	26.2
		3		2600	8	39.98	29.52	26.86
		3		2602	10	43.35	30.15	27.52
		3		2604	12	44.55	30.15	28.18
		3		2606	14	45.75	29.52	28.18
		3		2608	16	48.15	29.52	28.18
		3		2610	18	51.45	29.52	30.16
		3		2612	20	49.42	30.15	32.14
		3		2614	22	48.15	33.45	34.3
		3		2616	24	46.95	45.12	41.84
		3		2617	1		48
73-74	74	3	14	2618	2	44.55	46.08	57
		3		2620	4	43.35	45.12	57
		3		2622	6	42.2	41.28	53.4
		3		2624	8	39.98	37.58	49.8
		3		2626	10	37.2	35.1	45.69
		3		2628	12	35.09	34.28	42.61
		3		2630	14	32.98	33.45	41.84
		3		2632	16	30.6	31.8	40.3
		3		2634	18	28.83	30.98	39.55
		3		2636	20	28.83	30.15	38.05
		3		2638	22	28.83	29.52	35.8
		3		2640	24	28.39	42.24	34.3
74-75	74	7	19	2642	2	2.9
		7		2644	4	2.9
		7		2646	6	2.9
		7		2648	8	3
		7		2650	10	3.1
		7		2652	12	3.2
		7		2654	14	3.4
		7		2656	16	3.7
		7		2658	18	4.6
		7		2660	20	4.4
		7		2662	22	4.2
		7		2664	24	3.9
74-75	74	8	12	2666	2	18.2
		8		2668	4	23
		8		2670	6	27.2
		8		2672	8	24.8
		8		2674	10	23
		8		2676	12	20.6
		8		2678	14	18.8
		8		2680	16	16.5
		8		2682	18	14.5
		8		2684	20	13
		8		2686	22	12
		8		2688	24	11.4
74-75	74	8	17	2690	2	5.8
		8		2692	4	6
		8		2694	6	6
		8		2696	8	6.9
		8		2698	10	9
		8		2700	12	15
		8		2702	14	15.5
		8		2704	16	20
		8		2706	18	21.2
		8		2708	20	17
		8		2710	22	13.5
		8		2712	24	11.1
74-75	74	8	19	2714	2	5.4
		8		2716	4	5.4
		8		2718	6	5.2
		8		2720	8	6.3
		8		2722	10	6.9
		8		2724	12	8.1
		8		2726	14	10.5
		8		2728	16	12.5
		8		2730	18	13
		8		2732	20	13.5
		8		2734	22	13.5
		8		2736	24	14
74-75	74	10	17	2738	2	3.7
		10		2740	4	3.5
		10		2742	6	3.2
		10		2744	8	3.5
		10		2746	10	3.8
		10		2748	12	3.8
		10		2750	14	4.2
		10		2752	16	5
		10		2754	18	5.8
		10		2756	20	5
		10		2758	22	4.4
		10		2760	24	3.9
74-75	74	10	19	2762	2	2.8
		10		2764	4	2.75
		10		2766	6	2.7
		10		2768	8	2.95
		10		2770	10	3.1
		10		2772	12	3.5
		10		2774	14	4.2
		10		2776	16	5.2
		10		2778	18	5.8
		10		2780	20	5.2
		10		2782	22	4.8
		10		2784	24	4.2
74-75	74	11	9	2786	2	2.95
		11		2788	4	3
		11		2790	6	3.1
		11		2792	8	3.3
		11		2794	10	3.6
		11		2796	12	4
		11		2798	14	5.6
		11		2800	16	5.6
		11		2802	18	5.8
		11		2804	20	5.4
		11		2806	22	5
		11		2808	24	4.6
74-75	74	11	20	2810	2	6.3
		11		2812	4	8.1
		11		2814	6	9.6
		11		2816	8	11.4
		11		2818	10	13.5
		11		2820	12	17.6
		11		2822	14	47.2
		11		2824	16	82.5
		11		2826	18	96
		11		2828	20	73.2
		11		2830	22	52.7
		11		2832	24	37.8
74-75	74	11	21	2834	2		5.2
		11		2836	4		5.8
		11		2838	6		6.7
		11		2840	8		7.6
		11		2842	10		8.5
		11		2844	12		10.8
		11		2846	14		13.2
		11		2848	16		17
		11		2850	18		22
		11		2852	20		30
		11		2854	22		30
		11		2856	24		25.8
74-75	74	11	22	2858	2		22
		11		2860	4		19
		11		2862	6		17
		11		2864	8		14.5
		11		2866	10		13.2
		11		2868	12		12.4
		11		2870	14		11.6
		11		2872	16		11.6
		11		2874	18		11.6
		11		2876	20		13.6
		11		2878	22		14.5
		11		2880	24		13.6
74-75	75	1	12	2882	2	5
		1		2884	4	5.6
		1		2886	6	5.8
		1		2888	8	6.9
		1		2890	10	7.2
		1		2892	12	11.1
		1		2894	14	11.1
		1		2896	16	12
		1		2898	18	13.5
		1		2900	20	11.1
		1		2902	22	9.6
		1		2904	24	8.1
74-75	75	1	13	2906	2	6.9
		1		2908	4	5.6
		1		2910	6	4.4
		1		2912	8	5.6
		1		2914	10	6.3
		1		2916	12	7.5
		1		2918	14	11.7
		1		2920	16	12
		1		2922	18	12.5
		1		2924	20	5.6
		1		2926	22	5.2
		1		2928	24	10.5
74-75	75	1	14	2930	2	9.6
		1		2932	4	9
		1		2934	6	8.4
		1		2936	8	8.7
		1		2938	10	9.3
		1		2940	12	9.9
		1		2942	14	12
		1		2944	16	12.5
		1		2946	18	13
		1		2948	20	15
		1		2950	22	17.6
		1		2952	24	20.6
74-75	75	1	15	2954	2		12
		1		2956	4		12.4
		1		2958	6		12.8
		1		2960	8		13.2
		1		2962	10		13.2
		1		2964	12		14.5
		1		2966	14		15.5
		1		2968	16		16
		1		2970	18		19
		1		2972	20		21
		1		2974	22		21.5
		1		2976	24		21.5
74-75	75	1	16	2978	2	17.6
		1		2980	4	17
		1		2982	6	16.5
		1		2984	8	13.5
		1		2986	10	11.7
		1		2988	12	10.5
		1		2990	14	9
		1		2992	16	7.8
		1		2994	18	6.6
		1		2996	20	6.6
		1		2998	22	6.6
		1		3000	24	6.6
74-75	75	1	17	3002	2
		1		3004	4
		1		3006	6
		1		3008	8
		1		3010	10
		1		3012	12
		1		3014	14
		1		3016	16
		1		3018	18
		1		3020	20
		1		3022	22
		1		3024	24
74-75	75	1	18	3026	2
		1		3028	4
		1		3030	6
		1		3032	8
		1		3034	10
		1		3036	12
		1		3038	14
		1		3040	16
		1		3042	18
		1		3044	20
		1		3046	22
		1		3048	24
74-75	75	1	19	3050	2	7.2
		1		3052	4	8.4
		1		3054	6	9
		1		3056	8	9.6
		1		3058	10	11.1
		1		3060	12	12.5
		1		3062	14	16
		1		3064	16	17
		1		3066	18	17.6
		1		3068	20	21.2
		1		3070	22	25.4
		1		3072	24	29.8
74-75	75	1	20	3074	2	20
		1		3076	4	20.6
		1		3078	6	21.2
		1		3080	8	23.6
		1		3082	10	26
		1		3084	12	28.4
		1		3086	14	31.4
		1		3088	16	34.6
		1		3090	18	37.8
		1		3092	20	34.6
		1		3094	22	32.2
		1		3096	24	29
74-75	75	1	21	3098	2	27.8
		1		3100	4	25.4
		1		3102	6	23.6
		1		3104	8	25.4
		1		3106	10	27.8
		1		3108	12	29
		1		3110	14	33.8
		1		3112	16	36.2
		1		3114	18	37.8
		1		3116	20	36.2
		1		3118	22	35.4
		1		3120	24	33.8
74-75	75	1	23	3122	2
		1		3124	4
		1		3126	6
		1		3128	8
		1		3130	10
		1		3132	12
		1		3134	14
		1		3136	16
		1		3138	18
		1		3140	20
		1		3142	22
		1		3144	24
74-75	75	1	24	3146	2	14.5	21		5.96
		1		3148	4	14.5	20.5		5.96
		1		3150	6	14.5	20.5		5.96
		1		3152	8	10	20		6.58
		1		3154	10	25.4	20		7.41
		1		3156	12	28.4	20.5		8.24
		1		3158	14	33	21		8.92
		1		3160	16	37	23.5		9.6
		1		3162	18	45	29.4		10.48
		1		3164	20	102.4	37		12.25
		1		3166	22	173	64		14.09
		1		3168	24	253.4	78.4		15.02
74-75	75	1	25	3170	2	246.8	128		13.15
		1		3172	4	310.84	186		11.35
		1		3174	6	275.4	274.26		10.48
		1		3176	8	225	158		9.6
		1		3178	10	181	112		8.41
		1		3180	12	139	72.4		8.24
		1		3182	14	100.8	62.8		8.07
		1		3184	16	68	51.4		7.9
		1		3186	18	45	48.1		7.74
		1		3188	20	42.6	47		7.57
		1		3190	22	41	45		7.41
		1		3192	24	40.2	41		7.24
74-75	75	1	26	3194	2	37.8
		1		3196	4	37
		1		3198	6	36.2
		1		3200	8	35.4
		1		3202	10	33.8
		1		3204	12	32.2
		1		3206	14	30.6
		1		3208	16	29
		1		3210	18	28.4
		1		3212	20	27.4
		1		3214	22	27.2
		1		3216	24	26.6
74-75	75	1	27	3218	2	25.4
		1		3220	4	24.8
		1		3222	6	24.2
		1		3224	8	23.6
		1		3226	10	23.6
		1		3228	12	23
		1		3230	14	23
		1		3232	16	22
		1		3234	18	21.8
		1		3236	20	20.6
		1		3238	22	19.4
		1		3240	24	18.2
74-75	75	1	28	3242	2	17
		1		3244	4	15.5
		1		3246	6	14.5
		1		3248	8	15
		1		3250	10	16
		1		3252	12	16.5
		1		3254	14	19.4
		1		3256	16	21.2
		1		3258	18	22.4
		1		3260	20	21.8
		1		3262	22	21.8
		1		3264	24	21.2
74-75	75	1	30	3266	2	14.5
		1		3268	4	13
		1		3270	6	12.5
		1		3272	8	13
		1		3274	10	15
		1		3276	12	18.2
		1		3278	14	24.8
		1		3280	16	29
		1		3282	18	32.2
		1		3284	20	29
		1		3286	22	27.2
		1		3288	24	21.8
74-75	75	2	11	3290	2	17
		2		3292	4	17.6
		2		3294	6	17.6
		2		3296	8	23
		2		3298	10	24.2
		2		3300	12	26.6
		2		3302	14	28.4
		2		3304	16	30.6
		2		3306	18	31.4
		2		3308	20	21.8
		2		3310	22	24.2
		2		3312	24	24.8
74-75	75	2	13	3314	2	22.4
		2		3316	4	21.8
		2		3318	6	21.8
		2		3320	8	24.2
		2		3322	10	24.8
		2		3324	12	26
		2		3326	14	29
		2		3328	16	29.8
		2		3330	18	31.4
		2		3332	20	30.6
		2		3334	22	29.8
		2		3336	24	29.8
74-75	75	2	14	3338	2	29
		2		3340	4	28.4
		2		3342	6	27.8
		2		3344	8	30.6
		2		3346	10	32.2
		2		3348	12	35.4
		2		3350	14	39.4
		2		3352	16	41.8
		2		3354	18	44.2
		2		3356	20	42.6
		2		3358	22	41
		2		3360	24	39.4
74-75	75	2	25	3362	2	15
		2		3364	4	14
		2		3366	6	14
		2		3368	8	16
		2		3370	10	18.2
		2		3372	12	18.8
		2		3374	14	23
		2		3376	16	26.6
		2		3378	18	30.6
		2		3380	20	27.8
		2		3382	22	26
		2		3384	24	23.6
74-75	75	2	26	3386	2	21.2
		2		3388	4	19.4
		2		3390	6	17
		2		3392	8	18.8
		2		3394	10	20
		2		3396	12	23.6
		2		3398	14	27.2
		2		3400	16	28.4
		2		3402	18	32.2
		2		3404	20	29.8
		2		3406	22	27.8
		2		3408	24	25.4
74-75	75	2	27	3410	2	23.6
		2		3412	4	21.8
		2		3414	6	20
		2		3416	8	22.4
		2		3418	10	24.8
		2		3420	12	25.4
		2		3422	14	27.2
		2		3424	16	27.8
		2		3426	18	27.8
		2		3428	20	27.2
		2		3430	22	26.6
		2		3432	24	26
75-76	76	1	3	3434	2	6.62
		1		3436	4	6.96
		1		3438	6	7.13
		1		3440	8	9.4
		1		3442	10	12
		1		3444	12	14.29
		1		3446	14	15.45
		1		3448	16	16.32
		1		3450	18	16.61
		1		3452	20	15.16
		1		3454	22	13.5
		1		3456	24	12.25
75-76	76	1	5	3458	2	7.51
		1		3460	4	7.13
		1		3462	6	6.79
		1		3464	8	7.93
		1		3466	10	8.77
		1		3468	12	9.4
		1		3470	14	10.45
		1		3472	16	11.5
		1		3474	18	12.25
		1		3476	20	10.03
		1		3478	22	10.24
		1		3480	24	9.19
75-76	76	1	8	3482	2	6.62
		1		3484	4	6.28
		1		3486	6	6.11
		1		3488	8	6.96
		1		3490	10	7.72
		1		3492	12	9.19
		1		3494	14	10.66
		1		3496	16	12
		1		3498	18	13.5
		1		3500	20	12.75
		1		3502	22	12.25
		1		3504	24	11.5
75-76	76	1	10	3506	2	6.96
		1		3508	4	6.79
		1		3510	6	6.45
		1		3512	8	7.51
		1		3514	10	8.56
		1		3516	12	9.61
		1		3518	14	10.66
		1		3520	16	12
		1		3522	18	13.5
		1		3524	20	12.5
		1		3526	22	11.5
		1		3528	24	10.87
75-76	76	1	11	3530	2	9.82	14.36
		1		3532	4	9.19	13.22
		1		3534	6	8.35	11.7
		1		3536	8	8.77	11.06
		1		3538	10	9.19	10.42
		1		3540	12	9.61	9.78
		1		3542	14	10.03	9.46
		1		3544	16	10.45	9.14
		1		3546	18	10.87	9.14
		1		3548	20	10.24	9.46
		1		3550	22	10.03	11.06
		1		3552	24	9.61	12.84
75-76	76	1	14	3554	2	8.56
		1		3556	4	8.35
		1		3558	6	8.14
		1		3560	8	8.77
		1		3562	10	9.19
		1		3564	12	9.82
		1		3566	14	10.45
		1		3568	16	11.08
		1		3570	18	11.75
		1		3572	20	11.75
		1		3574	22	12
		1		3576	24	12
75-76	76	1	18	3578	2	12.5		14.86
		1		3580	4	12		14.86
		1		3582	6	11.5		15.24
		1		3584	8	12		16
		1		3586	10	12.25		17.14
		1		3588	12	12.75		17.9
		1		3590	14	13.5		19.13
		1		3592	16	14.29		19.95
		1		3594	18	14.87		21.18
		1		3596	20	13.75		20.77
		1		3598	22	12.5		20.77
		1		3600	24	11.75		20.36
75-76	76	1	19	3602	2	10.87
		1		3604	4	10.03
		1		3606	6	9.19
		1		3608	8	9.82
		1		3610	10	10.45
		1		3612	12	11.08
		1		3614	14	11.5
		1		3616	16	11.5
		1		3618	18	12.5
		1		3620	20	11.75
		1		3622	22	12
		1		3624	24	11.75
75-76	76	1	20	3626	2	18.88	12.08	16.38
		1		3628	4	20.6	12.08	16.76
		1		3630	6	23	12.46	15.24
		1		3632	8	22.2	12.84	16
		1		3634	10	21.4	14.36	16.76
		1		3636	12	21	15.12	17.52
		1		3638	14	20.2	19	18.31
		1		3640	16	19.54	23.68	19.13
		1		3642	18	19.21	23.68	19.95
		1		3644	20	16.61	21.56	19.13
		1		3646	22	14.87	19	18.72
		1		3648	24	13	19	17.9
75-76	76	1	22	3650	2	10.87
		1		3652	4	11.5
		1		3654	6	12.25
		1		3656	8	12.75
		1		3658	10	13.25
		1		3660	12	13.75
		1		3662	14	14.29
		1		3664	16	14.87
		1		3666	18	15.45
		1		3668	20	14
		1		3670	22	13
		1		3672	24	12
75-76	76	1	24	3674	2	8.14
		1		3676	4	7.51
		1		3678	6	7.13
		1		3680	8	7.51
		1		3682	10	7.93
		1		3684	12	8.56
		1		3686	14	8.98
		1		3688	16	9.61
		1		3690	18	10.03
		1		3692	20	9.82
		1		3694	22	9.4
		1		3696	24	9.19
75-76	76	1	26	3698	2	11.08	10.42	14.48
		1		3700	4	11.75	10.74	14.48
		1		3702	6	12.25	11.7	14.86
		1		3704	8	13.5	12.84	15.62
		1		3706	10	15.45	14.36	16.38
		1		3708	12	17.23	14.74	17.14
		1		3710	14	18.88	14.74	17.9
		1		3712	16	21	15.12	18.72
		1		3714	18	23.4	15.5	19.54
		1		3716	20	22.6	16.5	20.77
		1		3718	22	21.4	17.5	22
		1		3720	24	20.6	18.5	23.41
75-76	76	1	28	3722	2			28.23	9.59
		1		3724	4			29.76	9.88
		1		3726	6			37.02	10.46
		1		3728	8			38.24	10.75
		1		3730	10			37.02	11.04
		1		3732	12			34.7	11.62
		1		3734	14			32.96	11.91
		1		3736	16			31.29	12.2
		1		3738	18			30.27	12.5
		1		3740	20			30.78	14.9
		1		3742	22			31.29	21.14
		1		3744	24			31.8	16.28
75-76	76	1	29	3746	2			32.38
		1		3748	4			32.96
		1		3750	6			33.54
		1		3752	8			29.25
		1		3754	10			30.27
		1		3756	12			28.78
		1		3758	14			27.21
		1		3760	16			25.76
		1		3762	18			24.82
		1		3764	20			25.29
		1		3766	22			25.76
		1		3768	24			24.35
75-76	76	2	2	3770	2	14
		2		3772	4	13.75
		2		3774	6	13.75
		2		3776	8	14.87
		2		3778	10	16.03
		2		3780	12	16.9
		2		3782	14	18.22
		2		3784	16	18.55
		2		3786	18	18.88
		2		3788	20	18.55
		2		3790	22	17.89
		2		3792	24	17.56
75-76	76	2	5	3794	2	18.88
		2		3796	4	23.8
		2		3798	6	25.14
		2		3800	8	25.16
		2		3802	10	27.02
		2		3804	12	27.96
		2		3806	14	28.43
		2		3808	16	29.49
		2		3810	18	30.08
		2		3812	20	29.49
		2		3814	22	28.9
		2		3816	24	28.43
75-76	76	2	6	3818	2			35.86
		2		3820	4			38.88
		2		3822	6			40.8
		2		3824	8			39.52
		2		3826	10			38.24
		2		3828	12			36.44
		2		3830	14			34.7
		2		3832	16			33.54
		2		3834	18			32.38
		2		3836	20			30.78
		2		3838	22			31.78
		2		3840	24			34.7
75-76	76	2	7	3842	2	28.43		38.24
		2		3844	4	28.43		43.36
		2		3846	6	27.96		44.75
		2		3848	8	28.9		43.36
		2		3850	10	29.49		42.08
		2		3852	12	30.08		40.16
		2		3854	14	31.26		39.52
		2		3856	16	33.03		37.6
		2		3858	18	34.21		37.02
		2		3860	20	34.8		35.86
		2		3862	22	36.36		35.86
		2		3864	24	31.26		37.6
75-76	76	2	8	3866	2			41.44
		2		3868	4			44.75
		2		3870	6			46.25
		2		3872	8			50
		2		3874	10			55.85
		2		3876	12			59.33
		2		3878	14			58.46
		2		3880	16			56.72
		2		3882	18			53.24
		2		3884	20			50.75
		2		3886	22			50.75
		2		3888	24			52.37
75-76	76	2	9	3890	2		39.02	54.11
		2		3892	4		37.44	54.11
		2		3894	6		35.86	52.37
		2		3896	8		33.49	50
		2		3898	10		32.7	47
		2		3900	12		32.01	44
		2		3902	14		30.63	41.44
		2		3904	16		29.25	39.52
		2		3906	18		27.87	37.6
		2		3908	20		26.49	34.7
		2		3910	22		25.8	33.54
		2		3912	24		26.49	33.54
75-76	76	2	13	3914	2	15.45
		2		3916	4	15.45
		2		3918	6	15.45
		2		3920	8	15.75
		2		3922	10	16.32
		2		3924	12	17.56
		2		3926	14	18.22
		2		3928	16	18.88
		2		3930	18	19.87
		2		3932	20	19.87
		2		3934	22	19.87
		2		3936	24	19.87
75-76	76	2	14	3938	2			27.72
		2		3940	4			32.38
		2		3942	6			34.7
		2		3944	8			35.28
		2		3946	10			33.54
		2		3948	12			32.96
		2		3950	14			31.8
		2		3952	16			30.78
		2		3954	18			29.25
		2		3956	20			29.25
		2		3958	22			29.25
		2		3960	24			26.23
75-76	76	2	21	3962	2	14.29
		2		3964	4	13.75
		2		3966	6	13.25
		2		3968	8	13.25
		2		3970	10	13.75
		2		3972	12	14.58
		2		3974	14	15.16
[truncated: 641 more rows]

## Sheet: Sheet2
	year	month	day		time	بي بكران	ديزج	بابا رود	قاسملو
	35	1	24	2	2			24.1
				4	4			26.5
				6	6			28.1
				8	8			28.9
				10	10			29.7
				12	12			30.5
				14	14			34.1
				16	16			39
				18	18			43.5
				20	20			48.5
				22	22			53.5
				24	24			59
	35	1	25	26	2			75.2
				28	4			93.5
				30	6			147.5
				32	8			147.5
				34	10			200
				36	12			162.5
				38	14			135
				40	16			123.5
				42	18			93.5
				44	20			85
				46	22			78
				48	24			71
	35	1	26	50	2			68.6
				52	4			65
				54	6			59
				56	8			65
				58	10			71
				60	12			75.2
				62	14			78
				64	16			82.2
				66	18			85
				68	20			90.1
				70	22			93.5
				72	24			95.3
	35	1	27	74	2			96.2
				76	4			98
				78	6			98
				80	8			99.8
				82	10			98
				84	12			92.65
				86	14			84.3
				88	16			77.3
				90	18			64.4
				92	20			64.4
				94	22			84.3
				96	24			101.6
	35	2	30	98	2			43.05
				100	4			44
				102	6			44.5
				104	8			44.5
				106	10			44.5
				108	12			45
				110	14			46
				112	16			47
				114	18			48
				116	20			51
				118	22			54.6
				120	24			56.25
	35	2	31	122	2			54.6
				124	4			49.5
				126	6			47
				128	8			46
				130	10			46
				132	12			47
				134	14			47
				136	16			47
				138	18			49
				140	20			51
				142	22			52
				144	24			51
	35	7	25	146	2			1.42
				148	4			1.42
				150	6			1.42
				152	8			1.5
				154	10			1.6
				156	12			3.72
				158	14			9.06
				160	16			7.8
				162	18			6.4
				164	20			5.8
				166	22			5.48
				168	24			5
	35	7	29	170	2			3.24
				172	4			3.24
				174	6			3.24
				176	8			3.36
				178	10			3.36
				180	12			3.6
				182	14			3.72
				184	16			3.72
				186	18			3.72
				188	20			4.08
				190	22			9.06
				192	24			8
	35	7	30	194	2			6.8
				196	4			6.28
				198	6			6.04
				200	8			5.8
				202	10			5.48
				204	12			5.48
				206	14			5.32
				208	16			5.16
				210	18			5.16
				212	20			5.16
				214	22			5
				216	24			4.84
	35	8	8	218	2			4.08
				220	4			4.36
				222	6			4.52
				224	8			4.84
				226	10			4.16
				228	12			6.4
				230	14			7.4
				232	16			7.4
				234	18			6.4
				236	20			6.28
				238	22			6.4
				240	24			6.4
	35	9	4	242	2
				244	4
				246	6			4.2
				248	8			4.52
				250	10			5.48
				252	12			6.16
				254	14			7.8
				256	16			9.94
				258	18			8.62
				260	20			8.2
				262	22
				264	24
	35	12	11	266	2			7.8
				268	4			7.8
				270	6			7.8
				272	8			7.8
				274	10			7.8
				276	12			8
				278	14			8.2
				280	16			8.2
				282	18			8.62
				284	20			9.28
				286	22			14.04
				288	24			17.6
	35	12	12	290	2			18.88
				292	4			18.88
				294	6			18.88
				296	8			19.2	3.7
				298	10			19.2	4.34
				300	12			24.08	4.98
				302	14			36.38	5.98
				304	16			46.4	6.83
				306	18			61.56	4.83
				308	20			76.5	3.7
				310	22			89.14
				312	24			88.06
	35	12	13	314	2			74.5
				316	4			64.44
				318	6			54.84
				320	8			40.92
				322	10			31.92
				324	12			27
				326	14			23.36
				328	16			21.1
				330	18			19.58
				332	20			18.88
				334	22			18.24
				336	24			18.24
	35	12	20	338	2			10.6
				340	4			10.6
				342	6			10.6
				344	8			10.6
				346	10			10.6
				348	12			10.6
				350	14			10.6
				352	16			10.16
				354	18			10.16
				356	20			10.16
				358	22			10.6
				360	24			16.64
	35	12	21	362	2			17.92
				364	4			16.64
				366	6			14.32
				368	8			13.2
				370	10			12.16
				372	12			11.64
				374	14			11.38
				376	16			11.12
				378	18			11.12
				380	20			10.6
				382	22			10.6
				384	24			10.6
	35	12	27	386	2			11.65
				388	4			11.9
				390	6			12.68
				392	8			13.48	5.3
				394	10			14.32	7
				396	12			15.16	7.9
				398	14			16.32	12.7
				400	16			19.58	23
				402	18			27	23
				404	20			35.46	23
				406	22			43.56
				408	24			68.32
	35	12	28	410	2			100.16
				412	4			108.1
				414	6			100.16
				416	8			81.64
				418	10			58.68
				420	12			42.68
				422	14			32.8
				424	16			29.8
				426	18			28.2
				428	20			26.24
				430	22			25.16
				432	24			24.8
	36	1	11	434	2
				436	4
				438	6			17.92
				440	8			18.24
				442	10			19.2
				444	12			20.72
				446	14			22.62
				448	16			24.8
				450	18			23.72
				452	20			23
				454	22
				456	24
	36	2	4	458	2			19.2
				460	4			19.2
				462	6			21.48
				464	8			26.6
				466	10			32.36
				468	12			38.68
				470	14			42.24
				472	16			44
				474	18			45.92
				476	20			47.84
				478	22			49.72
				480	24			58.2
	36	2	5	482	2			66.84
				484	4			73
				486	6			70.92
				488	8			63.96
				490	10			57.24
				492	12			46.88
				494	14			44
				496	16			41.36
				498	18			38.68
				500	20			35.92
				502	22			35
				504	24			33.24
	37	9	17	506	2			4
				508	4			4.2
				510	6			4.4
				512	8			5.4
				514	10			7.6
				516	12			9.5
				518	14			10
				520	16			9
				522	18			8.6
				524	20			8.3
				526	22			8.1
				528	24			7.6
	38	1	14	530	2
				532	4
				534	6		12
				536	8		12
				538	10		13
				540	12		14
				542	14		14.5
				544	16		16
				546	18		17
				548	20
				550	22
				552	24
	38	1	15	554	2
				556	4
				558	6		23
				560	8		21
				562	10		21
				564	12		20
				566	14		20
				568	16		18
				570	18		18
				572	20
				574	22
				576	24
	38	1	25	578	2
				580	4
				582	6		21
				584	8		23
				586	10		23
				588	12		28
				590	14		30
				592	16		31
				594	18		31
				596	20
				598	22
				600	24
	39	2	25	602	2
				604	4
				606	6		18
				608	8		21
				610	10		25
				612	12		29
				614	14		31
				616	16
				618	18
				620	20
				622	22
				624	24
	40	2	5	626	2
				628	4
				630	6			18.2
				632	8			18.2
				634	10			18.6
				636	12			19
				638	14			19.3
				640	16			19.6
				642	18			19.9
				644	20
				646	22
				648	24
	40	2	6	650	2
				652	4
				654	6			23.6
				656	8			23.9
				658	10			24
				660	12			23.9
				662	14			23.5
				664	16			23.1
				666	18			22.1
				668	20
				670	22
				672	24
	40	2	7	674	2
				676	4
				678	6			22.1
				680	8			23.1
				682	10			23.2
				684	12			23
				686	14			22.4
				688	16			21.5
				690	18			20.6
				692	20
				694	22
				696	24
	40	2	8	698	2
				700	4
				702	6			23.5
				704	8			24
				706	10			35.2
				708	12			36.7
				710	14			28
				712	16			29.2
				714	18			29.7
				716	20
				718	22
				720	24
	40	2	9	722	2
				724	4
				726	6			29.9
				728	8			30
				730	10			30.8
				732	12			31.8
				734	14			33.4
				736	16			35.4
				738	18			36.5
				740	20
				742	22
				744	24
	40	2	10	746	2
				748	4
				750	6			32
				752	8			31.8
				754	10			31.6
				756	12			31.8
				758	14			32
				760	16			31
				762	18			29.9
				764	20
				766	22
				768	24
	40	2	11	770	2
				772	4
				774	6			36.7
				776	8			36.4
				778	10			35.8
				780	12			35.2
				782	14			34.6
				784	16			23.8
				786	18			23.6
				788	20
				790	22
				792	24
	40	2	12	794	2
				796	4
				798	6			23.4
				800	8			23.3
				802	10			23.2
				804	12			23.1
				806	14			23
				808	16			22.4
				810	18			21.8
				812	20
				814	22
				816	24
	40	2	13	818	2
				820	4
				822	6			22.7
				824	8			23
				826	10			23.1
				828	12			23
				830	14			22.4
				832	16			22.1
				834	18			21.8
				836	20
				838	22
				840	24
	40	2	14	842	2
				844	4
				846	6			22.1
				848	8			22.4
				850	10			22.4
				852	12			22.1
				854	14			22.1
				856	16			22
				858	18			21.2
				860	20
				862	22
				864	24
	40	2	15	866	2
				868	4
				870	6			22
				872	8			22.7
				874	10			23
				876	12			22.7
				878	14			22.4
				880	16			21.5
				882	18			20.9
				884	20
				886	22
				888	24
	40	2	16	890	2
				892	4
				894	6			21.2
				896	8			21.8
				898	10			22.1
				900	12			21.8
				902	14			21.2
				904	16			20.6
				906	18			20
				908	20
				910	22
				912	24
	40	2	17	914	2
				916	4
				918	6			20.9
				920	8			22.1
				922	10			23.1
				924	12			23.3
				926	14			23.4
				928	16			23.4
				930	18			23.5
				932	20
				934	22
				936	24
	40	2	18	938	2
				940	4
				942	6
				944	8			35.8
				946	10			34.9
				948	12			23.9
				950	14			23.5
				952	16			23.3
				954	18			23
				956	20			22.4
				958	22
				960	24
	40	2	19	962	2
				964	4
				966	6			20.9
				968	8			20.9
				970	10			20.6
				972	12			20.3
				974	14			19.9
				976	16			19.9
				978	18			19.4
				980	20
				982	22
				984	24
	40	9	1	986	2			1.07
				988	4			1.3
				990	6			2.06
				992	8			3.88
				994	10			6.2
				996	12			9.86
				998	14			13.29
				1000	16			14.88
				1002	18			14.88
				1004	20			13.96
				1006	22			12.45
				1008	24			10.52
	40	12	19	1010	2
				1012	4			12.24
				1014	6
				1016	8			13.73
				1018	10
				1020	12			14.19
				1022	14
				1024	16			13.29
				1026	18
				1028	20			12.66
				1030	22
				1032	24			13.08
	40	12	20	1034	2
				1036	4
				1038	6
				1040	8
				1042	10			11.06
				1044	12
				1046	14
				1048	16
				1050	18
				1052	20
				1054	22
				1056	24
	40	12	21	1058	2
				1060	4
				1062	6
				1064	8
				1066	10
				1068	12			10.8
				1070	14
				1072	16
				1074	18
				1076	20
				1078	22
				1080	24
	41	10	2	1082	2
				1084	4			4.54
				1086	6
				1088	8			6.4
				1090	10
				1092	12			7.2
				1094	14
				1096	16			7.2
				1098	18
				1100	20			7
				1102	22
				1104	24			6.2
	41	11	5	1106	2
				1108	4			7.8
				1110	6
				1112	8			8
				1114	10
				1116	12			8.8
				1118	14
				1120	16			10.74
				1122	18
				1124	20			10.96
				1126	22
				1128	24			13.08
	41	11	6	1130	2			14.42
				1132	4			14.88
				1134	6			14.42
				1136	8			14.42
				1138	10			12.66
				1140	12			13.5
				1142	14			15.57
				1144	16			17.12
				1146	18			16.9
				1148	20			16.46
				1150	22			15.11
				1152	24			14.42
	41	11	7	1154	2
				1156	4			13.08
				1158	6
				1160	8			10.74
				1162	10
				1164	12			8.6
				1166	14
				1168	16			7.6
				1170	18
				1172	20			7.2
				1174	22
				1176	24			6.8
	41	12	4	1178	2
				1180	4			7.2
				1182	6
				1184	8			10.08
				1186	10
				1188	12			10.3
				1190	14
				1192	16			4.86
				1194	18
				1196	20			6.64
				1198	22
				1200	24			8.6
	41	12	6	1202	2
				1204	4			9.42
				1206	6
				1208	8			10.74
				1210	10
				1212	12			12.03
				1214	14
				1216	16			12.24
				1218	18
				1220	20			12.03
				1222	22
				1224	24			13.5
	41	12	7	1226	2			15.34
				1228	4			16.9
				1230	6			17.12
				1232	8			14.88
				1234	10			12.66
				1236	12			10.96
				1238	14			9
				1240	16			9
				1242	18			8.4
				1244	20			8.2
				1246	22			8
				1248	24			8.4
	40	12	14	1250	2
				1252	4			8.4
				1254	6
				1256	8			10.08
				1258	10
				1260	12			10.52
				1262	14
				1264	16			11.4
				1266	18
				1268	20			11.18
				1270	22
				1272	24
	42	1	17	1274	2			13.96
				1276	4			15.8
				1278	6
				1280	8			17.12
				1282	10
				1284	12			17.34
				1286	14
				1288	16			16.4
				1290	18
				1292	20			16.46
				1294	22
				1296	24			15.8
	42	1	20	1298	2			19.92
				1300	4			22.01
				1302	6			24.77
				1304	8			27
				1306	10			27.96
				1308	12			29.8
				1310	14			31
				1312	16			32.03
				1314	18			32.87
				1316	20			34.07
				1318	22			35
				1320	24			37.08
	42	1	21	1322	2			38.64
				1324	4			40.68
				1326	6			43.1
				1328	8			46.64
				1330	10			47.83
				1332	12			47.66
				1334	14			47.15
				1336	16			46.98
				1338	18			46.14
				1340	20			45.02
				1342	22			43.3
				1344	24			41.85
	42	1	22	1346	2			41.34
				1348	4			41.34
				1350	6			41.34
				1352	8			41.34
				1354	10			41.34
				1356	12			41.34
				1358	14			41.34
				1360	16			40.84
				1362	18			40.2
				1364	20			39.88
				1366	22			39.72
				1368	24			39.56
	42	1	23	1370	2			39.88
				1372	4			41.17
				1374	6			41.68
				1376	8			41.68
				1378	10			41.68
				1380	12			39.72
				1382	14			38.83
				1384	16			37.88
				1386	18			36.66
				1388	20			35.4
				1390	22			34.26
				1392	24			33.29
	42	1	24	1394	2			32.45
				1396	4			31.61
				1398	6			31.2
				1400	8			31.2
				1402	10			30.4
				1404	12			29.8
				1406	14			29.6
				1408	16			28.92
				1410	18			28.44
				1412	20			27.72
				1414	22			26.8
				1416	24			26.2
	42	2	26	1418	2
				1420	4
				1422	6			39.72
				1424	8			42.7
				1426	10			44.7
				1428	12			48
				1430	14			54.25
				1432	16
				1434	18			56.7
				1436	20
				1438	22
				1440	24
	42	2	27	1442	2
				1444	4
				1446	6
				1448	8			37.5
				1450	10			35.4
				1452	12			34.26
				1454	14			36.24
				1456	16			37.5
				1458	18
				1460	20			39.4
				1462	22
				1464	24
	43	3	11	1466	2			27.7
				1468	4			28.6
				1470	6			29.8
				1472	8			31.3
				1474	10			33.4
				1476	12			36.1
				1478	14			40.2
				1480	16			43.1
				1482	18			44.8
				1484	20			44.4
				1486	22			42.8
				1488	24			40.6
	43	3	12	1490	2			40.6
				1492	4			36.7
				1494	6
				1496	8			37.8
				1498	10
				1500	12			41.3
				1502	14
				1504	16			41.9
				1506	18
				1508	20			39
				1510	22
				1512	24			34.3
	44	1	29	1514	2			10.1
				1516	4			10.3
				1518	6
				1520	8			11.5
				1522	10
				1524	12			12.3
				1526	14
				1528	16			15.4
				1530	18
				1532	20			15.8
				1534	22
				1536	24			19.7
	44	1	30	1538	2			21.5
				1540	4			23.1
				1542	6			25.4
				1544	8			27.1
				1546	10			27.1
				1548	12			23.1
				1550	14			24.2
				1552	16			23.1
				1554	18			22.5
				1556	20			22
				1558	22			22
				1560	24			21.2
	44	1	31	1562	2			21.2
				1564	4			21.2
				1566	6
				1568	8			21.5
				1570	10
				1572	12			21
				1574	14
				1576	16			20.5
				1578	18
				1580	20			20
				1582	22
				1584	24			19.4
	44	2	9	1586	2			21
				1588	4			23.1
				1590	6			26
				1592	8			31.3
				1594	10			34.1
				1596	12			36
				1598	14			37.5
				1600	16			39.2
				1602	18			39.9
				1604	20			38.5
				1606	22			36
				1608	24			34.1
	44	2	10	1610	2			34.1
				1612	4			34.5
				1614	6
				1616	8			34.5
				1618	10
				1620	12			32
				1622	14
				1624	16			28.5
				1626	18
				1628	20			25.7
				1630	22
				1632	24			23.9
	44	7	29	1634	2
				1636	4			6.77
				1638	6
				1640	8			6.77
				1642	10
				1644	12			6.77
				1646	14
				1648	16			7.52
				1650	18
				1652	20			8.89
				1654	22
				1656	24			11.3
	44	7	30	1658	2			13.9
				1660	4			19.1
				1662	6			24.5
				1664	8			26.8
				1666	10			28.2
				1668	12			31
				1670	14			33.8
				1672	16			36
				1674	18			36
				1676	20			35.1
				1678	22			29
				1680	24			24.5
	44	8	2	1682	2			13.9
				1684	4			14.1
				1686	6			13.9
				1688	8			14.1
				1690	10			14.3
				1692	12			16.1
				1694	14			22.5
				1696	16			27.6
				1698	18			32.7
				1700	20			40.3
				1702	22			72
				1704	24			91
	44	8	3	1706	2			90.5
				1708	4			87.5
				1710	6			84.2
				1712	8			79.5
				1714	10			72.8
				1716	12			64
				1718	14			53.7
				1720	16			43.4
				1722	18			37.8
				1724	20			33.8
				1726	22			30.4
				1728	24			28.8
	44	8	4	1730	2
				1732	4			25.7
				1734	6
				1736	8			23.4
				1738	10
				1740	12			22
				1742	14
				1744	16			21
				1746	18
				1748	20			20
				1750	22
				1752	24			18.8
	44	12	21	1754	2			7.89
				1756	4			9.28
				1758	6			9.09
				1760	8			9.7
				1762	10			10.6
				1764	12			11.8
				1766	14			16.3
				1768	16			22
				1770	18			26.2
				1772	20			28.2
				1774	22			28.5
				1776	24			29
	44	12	22	1778	2			30.7
				1780	4			32.7
				1782	6			33.4
				1784	8			33.4
				1786	10			31.7
				1788	12			28.2
				1790	14			25.1
				1792	16			22.8
				1794	18			21
				1796	20			20
				1798	22			18.8
				1800	24			17.9
	45	1	19	1802	2
				1804	4			11.3
				1806	6
				1808	8			12.7
				1810	10
				1812	12			14.3
				1814	14
				1816	16			17
				1818	18
				1820	20			22
				1822	22
				1824	24			20.2
	45	1	20	1826	2
				1828	4			20.2
				1830	6
				1832	8			19.7
				1834	10
				1836	12			17.6
				1838	14
				1840	16			15.8
				1842	18
				1844	20			14.7
				1846	22
				1848	24			13.9
	45	1	28	1850	2			18.8
				1852	4			20.5
				1854	6			23.9
				1856	8			26.2
				1858	10			28.5
				1860	12			29.3
				1862	14			28.8
				1864	16			27.4
				1866	18			25.4
				1868	20			23.4
				1870	22			22.5
				1872	24			22.8
	45	2	14	1874	2			23.1
				1876	4			25.1
				1878	6			26.5
				1880	8			27.9
				1882	10			29.3
				1884	12			30.4
				1886	14			31.3
				1888	16			32.7
				1890	18			34.8
				1892	20			36
				1894	22			36.3
				1896	24			36.3
	45	2	15	1898	2			36.3
				1900	4			36.6
				1902	6			37.2
				1904	8			38.5
				1906	10			40.6
				1908	12			41.3
				1910	14			38.5
				1912	16			35.1
				1914	18			31
				1916	20			28.8
				1918	22			27.4
				1920	24			26.5
	46	2	2	1922	2
				1924	4
				1926	6			29
				1928	8			29.6
				1930	10			29.9
				1932	12			29.6
				1934	14			28.7
				1936	16			28.4
				1938	18			27.8
				1940	20			27.5
				1942	22			27.5
				1944	24			27.5
	46	2	15	1946	2
				1948	4
				1950	6			35.7
				1952	8			38.5
				1954	10			40.6
				1956	12			41.3
				1958	14			41.3
				1960	16			40.95
				1962	18			38.5
				1964	20			36.4
				1966	22			35
				1968	24
	46	2	24	1970	2
				1972	4
				1974	6			46
				1976	8		111.8	50
				1978	10		91.9	54
				1980	12		75.2	63.4
				1982	14		60.6	69
				1984	16		57.8	72
				1986	18		57.8	75
				1988	20		50	74
				1990	22			72
				1992	24			69
	46	2	25	1994	2
				1996	4
				1998	6			75
				2000	8			77
				2002	10			79
				2004	12			70
				2006	14
				2008	16
				2010	18
				2012	20
				2014	22
				2016	24
	46	12	9	2018	2			6.09
				2020	4			6.78
				2022	6			7.14
				2024	8			7.14
				2026	10			6.96
				2028	12			6.78
				2030	14
				2032	16			6.43
				2034	18
				2036	20
				2038	22
				2040	24
	46	12	10	2042	2			7.5
				2044	4			8.4
				2046	6			8.22
				2048	8			7.5
				2050	10			7.14
				2052	12			6.96
				2054	14
				2056	16			6.78
				2058	18
				2060	20
				2062	22
				2064	24
	46	12	12	2066	2			10.4
				2068	4			14.39
				2070	6			14.39
				2072	8			13.13
				2074	10			12.29
				2076	12			11.66
				2078	14			10.03
				2080	16			10.61
				2082	18			10.2
				2084	20			9.8
				2086	22			9.8
				2088	24			10.61
	46	12	13	2090	2			12.71
				2092	4			13.34
				2094	6			13.13
				2096	8			11.24
				2098	10
				2100	12
				2102	14
				2104	16			8.4
				2106	18
				2108	20
				2110	22
				2112	24
	46	12	17	2114	2			7
				2116	4			7.14
				2118	6			7.32
				2120	8			7.68
				2122	10			8
				2124	12			8.4
				2126	14			9.4
				2128	16			11.24
				2130	18			11.66
				2132	20			11.45
				2134	22			11.45
				2136	24			12.08
	46	12	23	2138	2			7.32
				2140	4			7.5
				2142	6			7.86
				2144	8			8.22
				2146	10			10.4
				2148	12			11.24
				2150	14			13.13
				2152	16			17.4
				2154	18			17.64
				2156	20			15.44
				2158	22			14.18
				2160	24			13.34
	47	1	9	2162	2			8.22
				2164	4			8.22
				2166	6			8.4
				2168	8			8.8
				2170	10			9.2
				2172	12			9.4
				2174	14			9.8
				2176	16			10.3
				2178	18			12.8
				2180	20			10.45
				2182	22			11.66
				2184	24			11.66
	47	1	12	2186	2	11.73		11.24
				2188	4	12.7		11.45
				2190	6	13.82		11.66
				2192	8	15.2		12.08
				2194	10	16.36		12.92
				2196	12	17.5		13.97
				2198	14	18.05		14.39
				2200	16	18.32		13.97
				2202	18	18.6		13.13
				2204	20	19.7		12.5
				2206	22	19.97		12.29
				2208	24	20.25		12.08
	47	1	13	2210	2	20.8		12.08
				2212	4	21.07		12.92
				2214	6	21.35		13.97
				2216	8	21.62		16	5.8
				2218	10	23		19.56	5.68
				2220	12	23.97		21.96	5.8
				2222	14	24.3		24.16	5.92
				2224	16	24.95		26.82	5.92
				2226	18	25.6		29.92	6.76
				2228	20	25.92		27
				2230	22	27.72		27
				2232	24	19.97		28.18
	47	1	14	2234	2			29.92
				2236	4			30.5
				2238	6			30.21
				2240	8			29.05
				2242	10			27.89
				2244	12			27.89
				2246	14			28.18
				2248	16			28.18
				2250	18			25.26
				2252	20			23.88
				2254	22			23.04
				2256	24			22.2
	47	1	22	2258	2			15.72
				2260	4			16.84
				2262	6			17.64
				2264	8			18.12
				2266	10			18.36
				2268	12			18.36
				2270	14			18.12
				2272	16			17.88
				2274	18			17.4
				2276	20			17.12
				2278	22			17.12
				2280	24			17.64
	47	1	23	2282	2			18.12
				2284	4			19.56
				2286	6			20.52
				2288	8			21.48
				2290	10			21
				2292	12			21
				2294	14			20.52
				2296	16			20.28
				2298	18			19.8
				2300	20			19.32
				2302	22			19.32
				2304	24			20.06
	47	1	27	2306	2	17.04		25.52
				2308	4	16.81		27.34
				2310	6	16.58		29.34
				2312	8	17.04		31.1
				2314	10	26.9		31.4
				2316	12	29.5		31.1
				2318	14	48.6		30.5
				2320	16	51.3		30.21
				2322	18	58		30.21
				2324	20	60		30.8
				2326	22	62.5		31.7
				2328	24	65.8		33.5
	47	1	28	2330	2	73.6		36.8
				2332	4	75.4		39.2
				2334	6	77.4		41.5
				2336	8	79.5		44.7
				2338	10	81.6		46.2
				2340	12	84.4		46.85
				2342	14	90		45.9
				2344	16	105		45
				2346	18	109.5		44
				2348	20	114		44.7
				2350	22	113.2		45
				2352	24	112.5		45.9
	47	1	29	2354	2			50.35
				2356	4			53.15
				2358	6			55.25
				2360	8			55.95
				2362	10			55.95
				2364	12			55.25
				2366	14			55.25
				2368	16			53.15
				2370	18			51.75
				2372	20			51.75
				2374	22			57
				2376	24			57.4
	47	1	30	2378	2			62.8
				2380	4			64.8
				2382	6			69.6
				2384	8			75.6
				2386	10			82
				2388	12			77.2
				2390	14			75.2
				2392	16			72
				2394	18			69.2
				2396	20			66.4
				2398	22			64
				2400	24			62.5
	47	1	31	2402	2			60.6
				2404	4			60.2
				2406	6			60.2
				2408	8			61
				2410	10			60.6
				2412	12			61.3
				2414	14			61
				2416	16			59.8
				2418	18			58.6
				2420	20			56.65
				2422	22			53.85
				2424	24			51.05
	47	2	2	2426	2			39.9
				2428	4			41.5
				2430	6			44.1
				2432	8			45	9.76
				2434	10			46.2	11.33
				2436	12			47.2	11.46
				2438	14			49.3	12.11
				2440	16			52.8	11.72
				2442	18			57	11.46
				2444	20			61.6
				2446	22			65.2
				2448	24			63.1
	47	2	3	2450	2			59.8
				2452	4			57.8
				2454	6			57.4
				2456	8			56.65
				2458	10			55.25
				2460	12			53.15
				2462	14			51.4
				2464	16			49.65
				2466	18			46.2
				2468	20			44.4
				2470	22			42.7
				2472	24			41.5
	47	2	15	2474	2			28.95
				2476	4			31.75
				2478	6			33.15
				2480	8			35.25
				2482	10			35.95
				2484	12			35.6
				2486	14
				2488	16			33.15
				2490	18
				2492	20
				2494	22
				2496	24
	47	2	18	2498	2			31.05
				2500	4			33.15
				2502	6			34.05
				2504	8			35.95
				2506	10			37
				2508	12			37.35
				2510	14
				2512	16			33.15
				2514	18
				2516	20
				2518	22
				2520	24
	47	2	20	2522	2
				2524	4
				2526	6
				2528	8			37
				2530	10
				2532	12			34.55
				2534	14			35.95
				2536	16			36.3
				2538	18			37
				2540	20			39
				2542	22			41.3
				2544	24			42
	47	2	28	2546	2			37
				2548	4			39.1
				2550	6			41.3
				2552	8			43.7
				2554	10			45.55
				2556	12			45.9
				2558	14			45.9
				2560	16			45.2
				2562	18			42.9
				2564	20			40.5
				2566	22			38.4
				2568	24			38.4
	47	3	9	2570	2			34.9
				2572	4			38.4
				2574	6			41.3
				2576	8			45.2
				2578	10			45.9
				2580	12			46.6
				2582	14
				2584	16			45.55
				2586	18
				2588	20
				2590	22
				2592	24
	47	3	10	2594	2	46.35
				2596	4	48.6
				2598	6	50.4
				2600	8	51.3
				2602	10	53.1
				2604	12	55
				2606	14	58
				2608	16	60
				2610	18	66.4
				2612	20	76
				2614	22	66.4
				2616	24	57
	47	3	11	2618	2			42.9
				2620	4			44.5
				2622	6			46.95
				2624	8			48.9
				2626	10			48.45
				2628	12			46.95
				2630	14			45.2
				2632	16			44.1
				2634	18			42.1
				2636	20			41.3
				2638	22			39.8
				2640	24			39.45
	47	3	12	2642	2	52.2
				2644	4	56
				2646	6	73.6
				2648	8	85.8
				2650	10	78.1
				2652	12	71.2
				2654	14	64.5
				2656	16	59.5
				2658	18	54
				2660	20	49.15
				2662	22	44.2
				2664	24	39.8
	47	3	13	2666	2			38.75
				2668	4			41.3
				2670	6			44.5
				2672	8			49.8
				2674	10			52.5
				2676	12			54.5
				2678	14			55.3
				2680	16			53.3
				2682	18			47.3
				2684	20			44.5
				2686	22			42.1
				2688	24			40.5
	47	3	16	2690	2			40.15
				2692	4			42.1
				2694	6			44.5
				2696	8			46.95
				2698	10			44.85
				2700	12			49.8
				2702	14			49.8
				2704	16			49.8
				2706	18
				2708	20
				2710	22
				2712	24
	47	9	5	2714	2	6.92
				2716	4	8.78
				2718	6	9.68
				2720	8	10.8
				2722	10	11.64
				2724	12	12.86
				2726	14	12.2
				2728	16	14.57
				2730	18	14.34
				2732	20	14.18
				2734	22	14.01
				2736	24	13.85
	47	9	24	2738	2			8.4
				2740	4			8.6
				2742	6			9
				2744	8			9.4
				2746	10			9.8
				2748	12			11
				2750	14			12
				2752	16			12
				2754	18			12
				2756	20			12
				2758	22			12
				2760	24			11
	47	9	26	2762	2	14.18
				2764	4	14.51
				2766	6	14.84
				2768	8	15.17		8.4
				2770	10	15.8
				2772	12	17
				2774	14	17.9
				2776	16	18.65
				2778	18	17.9		11.4
				2780	20	16.7
				2782	22	16.1
				2784	24	15.17
	47	9	27	2786	2			16
				2788	4			15
				2790	6			13
				2792	8			12
				2794	10			12
				2796	12			11
				2798	14			11
				2800	16			10
				2802	18			10
				2804	20			9.8
				2806	22			9.4
				2808	24			9
	47	12	9	2810	2	17.45		15
				2812	4	17.45		17
				2814	6	17.45		18
				2816	8	17.45	74.2	20
				2818	10	27.2	75	23
				2820	12	28.75	75	27
				2822	14	36.1	75.9	30
				2824	16	43.25	75.9	33
				2826	18	43	74.2	35
				2828	20	42.75		37
				2830	22	42.5		41
				2832	24	42.25		50
	47	12	10	2834	2			71
				2836	4			83
				2838	6			78
				2840	8			62
				2842	10			22
				2844	12			31
				2846	14			25
				2848	16			22
				2850	18			20
				2852	20			20
				2854	22			20
				2856	24			21
	47	12	11	2858	2			23
				2860	4			22
				2862	6			20
				2864	8			18
				2866	10			17
				2868	12			16
				2870	14			15
				2872	16			14
				2874	18			14
				2876	20			14
				2878	22			14
				2880	24			14
	47	12	12	2882	2			15
				2884	4			15
				2886	6			15
				2888	8			15
				2890	10			14
				2892	12			14
				2894	14			15
				2896	16			15
				2898	18			15
				2900	20			15
				2902	22			16
				2904	24			16
	47	12	13	2906	2			17
				2908	4			17
				2910	6			15
				2912	8			14
				2914	10			14
				2916	12			14
				2918	14			13
				2920	16			13
				2922	18			13
				2924	20			12
				2926	22			12
				2928	24			12
	47	12	14	2930	2			13
				2932	4			13
				2934	6			13
				2936	8			13
				2938	10			12
				2940	12			12
				2942	14			12
				2944	16			12
				2946	18			12
				2948	20			12
				2950	22			12
				2952	24			12
	47	12	15	2954	2			12
				2956	4			12
				2958	6			12
				2960	8			12
				2962	10			12
				2964	12			12
				2966	14			13
				2968	16			14
				2970	18			15
				2972	20			16
				2974	22			19
				2976	24			24
	47	12	16	2978	2			27
				2980	4			28
				2982	6			26
				2984	8			23
				2986	10			19
				2988	12			17
				2990	14			17
				2992	16			16
				2994	18			16
				2996	20			17
				2998	22			18
				3000	24			21
	47	12	17	3002	2			23
				3004	4			27
				3006	6			28
				3008	8			29
				3010	10			31
				3012	12			33
				3014	14			34
				3016	16			35
				3018	18			37
				3020	20			39
				3022	22			44
				3024	24			51
	47	12	18	3026	2			67
				3028	4			83
				3030	6			85
				3032	8			76
				3034	10			64
				3036	12			50
				3038	14			40
				3040	16			34
				3042	18			30
				3044	20			28
				3046	22			29
				3048	24			31
	47	12	19	3050	2			31
				3052	4			30
				3054	6			27
				3056	8			25
				3058	10			23
				3060	12			23
				3062	14			22
				3064	16			23
				3066	18			26
				3068	20			30
				3070	22			34
				3072	24			37
	47	12	20	3074	2			36
				3076	4			33
				3078	6			33
				3080	8			33
				3082	10			36
				3084	12			39
				3086	14			41
				3088	16			44
				3090	18			45
				3092	20			47
				3094	22			49
				3096	24			56
	47	12	21	3098	2			65
				3100	4			65
				3102	6			56
				3104	8			36
				3106	10			32
				3108	12			29
				3110	14			27
				3112	16			26
				3114	18			25
				3116	20			24
				3118	22			23
				3120	24			23
	47	12	22	3122	2			22
				3124	4			22
				3126	6			22
				3128	8			22
				3130	10			21
				3132	12			21
				3134	14			20
				3136	16			19
				3138	18			19
				3140	20			19
				3142	22			19
				3144	24			19
	47	12	23	3146	2			19
				3148	4			19
				3150	6			19
				3152	8			20
				3154	10			20
				3156	12			20
				3158	14			20
				3160	16			20
				3162	18			20
				3164	20			20
				3166	22			20
				3168	24			21
	47	12	24	3170	2			22
				3172	4			22
				3174	6			23
				3176	8			23
				3178	10			23
				3180	12			25
				3182	14			27
				3184	16			27
				3186	18			26
				3188	20			25
				3190	22			24
				3192	24			23
	47	12	25	3194	2			23
				3196	4			23
				3198	6			24
				3200	8			24
				3202	10			23
				3204	12			22
				3206	14			22
				3208	16			21
				3210	18			20
				3212	20			20
				3214	22			20
				3216	24			19
	47	12	26	3218	2			20
				3220	4			20
				3222	6			20
				3224	8			20
				3226	10			20
				3228	12			19
				3230	14			19
				3232	16			19
				3234	18			18
				3236	20			18
				3238	22			18
				3240	24			18
	47	12	27	3242	2			18
				3244	4			19
				3246	6			20
				3248	8			20
				3250	10			20
				3252	12			20
				3254	14			20
				3256	16			19
				3258	18			19
				3260	20			19
				3262	22			19
				3264	24			19
	47	12	28	3266	2			19
				3268	4			19
				3270	6			20
				3272	8			20
				3274	10			22
				3276	12			23
				3278	14			24
				3280	16			26
				3282	18			28
				3284	20			30
				3286	22			30
				3288	24			31
	47	12	29	3290	2			30
				3292	4			31
				3294	6			32
				3296	8			33
				3298	10			34
				3300	12			35
				3302	14			39
				3304	16			44
				3306	18			50
				3308	20			54
				3310	22			56
				3312	24			56
	47	12	30	3314	2
				3316	4
				3318	6
				3320	8
				3322	10
				3324	12
				3326	14
				3328	16
				3330	18
				3332	20
				3334	22
				3336	24
	48	1	1	3338	2
				3340	4
				3342	6
				3344	8			44
				3346	10			44
				3348	12			44
				3350	14			45
				3352	16			46
				3354	18			48
				3356	20			49
				3358	22			49
				3360	24			47
	48	1	2	3362	2			43
				3364	4			41
				3366	6			40
				3368	8			39
				3370	10			39
				3372	12			40
				3374	14			41
				3376	16			41
				3378	18			38
				3380	20			36
				3382	22			34
				3384	24			33
	48	1	3	3386	2			34
				3388	4			35
				3390	6			37
				3392	8			37
				3394	10			35
				3396	12			33
				3398	14			31
				3400	16			30
				3402	18			29
				3404	20			29
				3406	22			28
				3408	24			28
	48	1	9	3410	2			31
				3412	4			33
				3414	6			35
				3416	8			36
				3418	10			36
				3420	12			35
				3422	14			34
				3424	16			33
				3426	18			32
				3428	20			31
				3430	22			31
				3432	24			31
	48	1	11	3434	2			39
				3436	4			41
				3438	6			43
				3440	8			45
				3442	10			44
				3444	12			43
				3446	14			41
				3448	16			40
				3450	18			39
				3452	20			38
				3454	22			36
				3456	24			37
	48	1	12	3458	2	25.7		37
				3460	4	26.9		39
				3462	6	28		40
				3464	8	30	94	44
				3466	10	31.5	94	49
				3468	12	40.4	98	57
				3470	14	42.5	102	73
				3472	16	43.25	121	105
				3474	18	46	136
				3476	20	47
				3478	22	48
				3480	24	49
	48	1	13	3482	2
				3484	4
				3486	6
				3488	8			125
				3490	10
				3492	12
				3494	14
				3496	16			103
				3498	18
				3500	20
				3502	22
				3504	24
	48	1	14	3506	2
				3508	4
				3510	6
				3512	8			94
				3514	10
				3516	12
				3518	14
				3520	16			82
				3522	18
				3524	20
				3526	22
				3528	24
	48	1	15	3530	2
				3532	4
				3534	6
				3536	8			74
				3538	10
				3540	12
				3542	14
				3544	16			60
				3546	18
				3548	20
				3550	22
				3552	24
	48	1	16	3554	2
				3556	4
				3558	6
				3560	8			56
				3562	10
				3564	12
				3566	14
				3568	16			52
				3570	18
				3572	20
				3574	22
				3576	24
	48	7	29	3578	2			8.94
				3580	4			9.65
				3582	6			10.9
				3584	8			12.6
				3586	10			13.7
				3588	12			14.4
				3590	14			14.4
				3592	16			13.7
				3594	18			13.7
				3596	20			14.7
				3598	22			16.5
				3600	24			20.4
	48	7	30	3602	2			23.7
				3604	4			20.1
				3606	6			19.8
				3608	8			18.4
				3610	10			17.6
				3612	12			16.5
				3614	14			16.5
				3616	16			16
				3618	18			14.9
				3620	20			14.4
				3622	22			14
				3624	24			14
	48	10	2	3626	2			8
				3628	4			8
				3630	6			8
				3632	8			8
				3634	10			8.24
				3636	12			8.47
				3638	14			8.94
				3640	16			9.41
				3642	18			10.2
				3644	20			12.2
				3646	22			16.7
				3648	24			24.3
	48	10	3	3650	2			31.2
				3652	4			33.8
				3654	6			31.2
				3656	8			28.7
				3658	10			29
				3660	12			28
				3662	14			25.5
				3664	16			22.8
				3666	18			20.1
				3668	20			18.1
				3670	22			16.7
				3672	24			16
	48	12	27	3674	2	5.58
				3676	4	5.58
				3678	6	5.99
				3680	8	5.99
				3682	10	14.5
				3684	12	26.45
				3686	14	31.8
				3688	16	39.65
				3690	18	34.4
				3692	20	29.7
				3694	22	25.35
				3696	24	21.25
	49	1	17	3698	2			20.4
				3700	4			21.6
				3702	6			21.6
				3704	8			21
				3706	10			20.4
				3708	12			19.5
				3710	14			18.7
				3712	16			18.4
				3714	18			17.8
				3716	20			17.8
				3718	22			18.4
				3720	24			21
	49	1	18	3722	2	19.5		17.6
				3724	4	19.5		18.7
				3726	6	20		20.1
				3728	8	20		21.9
				3730	10	19.5		22.5
				3732	12	33		23.1
				3734	14	37.9		23.4
				3736	16	43.5		23.7
				3738	18	41.4		24.9
				3740	20	39.3		24
				3742	22	37.2		23.4
				3744	24	35.1		23.1
	49	1	29	3746	2	29.4		23.4
				3748	4	30.6		24
				3750	6	31.8		24.3
				3752	8	33		24.9
				3754	10	42.1		25.8
				3756	12	47.7		26.8
				3758	14	51.9		28
				3760	16	68.7		30.3
				3762	18	68.7		32.9
				3764	20	69.4		38.7
				3766	22	69.4		39.9
				3768	24	69.4		41.1
	49	1	30	3770	2			43.1	4.09
				3772	4			47.1	4.09
				3774	6			51.5	4.09
				3776	8			56.4	4.09
				3778	10			60	4.48
				3780	12			68.6	5.7
				3782	14			66.8	5.98
				3784	16			66.8	5.7
				3786	18			71.7	5.98
				3788	20			69	5.98
				3790	22			69	5.98
				3792	24			69	5.98
	49	1	31	3794	2			68.6	4.87
				3796	4			71.3	4.87
				3798	6			72.1	4.87
				3800	8			63.2	4.87
				3802	10			56	4.22
				3804	12			52.4	4.22
				3806	14			52.4	4.22
				3808	16			52.4	4.22
				3810	18			53.3	4.22
				3812	20			49.5	4.22
				3814	22			47.5	4.22
				3816	24			45.9	4.22
	49	3	2	3818	2			17.6
				3820	4			19.5
				3822	6			20.1
				3824	8			20.1
				3826	10			19
				3828	12			18.1
				3830	14			17.6
				3832	16			16.7
				3834	18			16.5
				3836	20			16
				3838	22			16
				3840	24			17
	49	3	3	3842	2			18.4
				3844	4			19.5
				3846	6			19.5
				3848	8			19
				3850	10			18.4
				3852	12			17.8
				3854	14			17.3
				3856	16			16.5
				3858	18			15.4
				3860	20			14.9
				3862	22			14.7
				3864	24			15.2
	50	1	8	3866	2			6.48
				3868	4			8.23
				3870	6			10.07
				3872	8			10.68
				3874	10			11.1
				3876	12			11.4
				3878	14			12
				3880	16			11.8
				3882	18			11.2
				3884	20			10.49
				3886	22			10.07
				3888	24			9.61
	50	1	13	3890	2			8
				3892	4			8.46
				3894	6			9.84
				3896	8			11.4
				3898	10			10.3
				3900	12			13
				3902	14			14.2
				3904	16			13.8
				3906	18			12.6
				3908	20			12.2
				3910	22			12.4
				3912	24			13
	50	1	17	3914	2			11.1
				3916	4			11.2
				3918	6			12
				3920	8			12.4
				3922	10			12.8
				3924	12			13
				3926	14			13.2
				3928	16			13.2
				3930	18			13.2
				3932	20			14
				3934	22			16
				3936	24			19.8
	50	1	18	3938	2			18.66
				3940	4			16.4
				3942	6			14.8
				3944	8			14.4
				3946	10			13.2
				3948	12			13
				3950	14			12.6
				3952	16			12.2
				3954	18			12
				3956	20			12
				3958	22			11.6
				3960	24			11.6
	50	1	21	3962	2			12.6
				3964	4			13.2
				3966	6			14.8
				3968	8			18.43
				3970	10			23.8
				3972	12			29.8
				3974	14			33.4
				3976	16			35.8
				3978	18			31.8
				3980	20			25
				3982	22			22.6
				3984	24			21.6
	50	1	24	3986	2			14.8
				3988	4			15.6
				3990	6			16.4
				3992	8			16.8
				3994	10			17.2
				3996	12			20.3
				3998	14			23.8
[truncated: 1,830 more rows]
