# Supplementary material for: Effects and consideration of storm movement in rainfall–runoff modelling at the basin scale
Source: Copernicus journal article supplement (doi:10.5194/hess-20-5063-2016), 2016-12-21
Supplement: Supplementary file 1 [file Source Data 1.xls]

## Sheet: Sheet1
	year	month	day		time	بي بكران	ديزج	بابا رود	قاسملو
70-71	70	8	12	2	2	2.6	12.58	2.89
		8		4	4	2.6	15.3	2.89
		8		6	6	2.76	18.3	2.89
		8		8	8	2.76	21.2	2.89
		8		10	10	3.75	19.5	3.9
		8		12	12	5.19	18.3	4.95
		8		14	14	6.72	17.1	6
		8		16	16	8.43	15.9	7.12
		8		18	18	8.72	15.3	7.76
		8		20	20	9.32	14.7	8.24
		8		22	22	9.65	14.1	8.88
		8		24	24	9.98	13.5	9.53
70-71	70	8	13	26	2			8.24
		8		28	4			8.56
		8		30	6			8.72
		8		32	8			12.19
		8		34	10			15.2
		8		36	12			13.15
		8		38	14			10.37
		8		40	16			12.75
		8		42	18			12.75
		8		44	20			9.87
		8		46	22			9.04
		8		48	24			8.88
70-71	71	1	8	50	2	10.3
		1		52	4	10.3
		1		54	6	10.3
		1		56	8	10.3
		1		58	10	11.92
		1		60	12	14.5
		1		62	14	19.12
		1		64	16	24.25
		1		66	18	22.6
		1		68	20	21.5
		1		70	22	20.55
		1		72	24	18.65
70-71	71	1	10	74	2	16.3	18.9	17.02
		1		76	4	15.4	17.1	18.86
		1		78	6	14.5	15.9	18.4
		1		80	8	14.5	15.3	17.94
		1		82	10	15.85	15.3	17.02
		1		84	12	24.25	14.7	16.57
		1		85	13			16.11
		1		86	14	27	14.1	16.57
		1		88	16	34	14.7	17.48
		1		90	18	30.5	18.3	16.11
		1		91	19			15.66
		1		92	20	27	25.45	16.11
		1		94	22	24.25	31.72	18.4
		1		96	24	21.5	29.86	22.27
70-71	71	1	11	122	2	17.22		25.8
		1		124	4	14.95		27.51
		1		126	6	12.25		25.22
		1		128	8	14.5		22.27
		1		130	10	17.22		20.29
		1		132	12	19.6		19.09
		1		134	14	23.7		18.17
		1		136	16	27		17.48
		1		138	18	24.8		16.11
		1		140	20	22.6		15.43
		1		142	22	20.55		17.48
		1		144	24	18.65		20.54
70-71	71	1	12	146	2			23.85
		1		148	4			25.22
		1		150	6			23.32
		1		152	8			21.26
		1		154	10			19.32
		1		156	12			18.17
		1		158	14			17.25
		1		160	16			16.57
		1		162	18			15.88
		1		164	20			15.2
		1		166	22			14.75
		1		168	24			15.2
70-71	71	1	23	170	2	36.28		16.11	10.38
		1		172	4	43.38		17.48	10.65
		1		174	6	51.5		18.86	11.19
		1		176	8	60.5		20.29	12
		1		178	10	46.05		20.78	13.52
		1		180	12	34		21.51	14.66
		1		182	14	24.25		21.26	15.8
		1		184	16	16.75		20.29	17.45
		1		186	18	17.7		19.81	22.01
		1		188	20	19.12		19.32	27.69
		1		190	22	20.08		19.32	34.7
		1		192	24	21.5		20.29	41.4
70-71	71	1	24	194	2	40.08	26.301	21.75	53.7
		1		196	4	46.94	27.15	24.37	65.08
		1		198	6	53.5	28	28.95	76.92
		1		200	8	83.3	28.93	34.8	76.92
		1		202	10	109.7	49	39.21	76.92
		1		204	12	134.7	141.2	42.88	76.92
		1		206	14	121.4	124.8	59.44	76.92
		1		208	16	95.7	174	77.2	76.92
		1		209	17		225.22
		1		210	18	83.3	215	177.75	70.15
		1		212	20	53.5	178.1	235.95	58.74
		1		214	22	47.83	141.2	257.07	51.18
		1		216	24	42.49	116.6	265.8	43.4
70-71	71	1	25	218	2		106.65	153.93
		1		220	4		88.23	107.51
		1		222	6		75.61	106.72
		1		224	8		65.18	105.15
		1		226	10		59.56	94.19
		1		228	12		51.64	84.32
		1		230	14		47.83	74.94
		1		232	16		45.49	60.3
		1		234	18		44.32	57.3
		1		236	20		43.15	54.74
		1		238	22		43.15	45.22
		1		240	24		44.32	42.88
70-71	71	1	29	242	2		26.3	31.62
		1		243	3		33.58
		1		244	4		28	34.8
		1		246	6		31.72	39.21
		1		248	8		35.44	41.76
		1		250	10		37.3	46.42
		1		252	12		31.72	53.03
		1		254	14		26.3	58.16
		1		256	16		25.45	47.22
		1		258	18		23.75	43.25
		1		260	20		22.9	41.02
		1		262	22		21.2	39.21
		1		264	24		19.5	40.27
70-71	71	2	1	266	2		15.9	27.8
		2		268	4		15.9	28.95
		2		270	6		16.5	29.52
		2		272	8		16.5	29.81
		2		274	10		17.7	30.71
		2		276	12		18.3	31.32
		2		278	14		19.5	31.93
		2		280	16		22.9	33.15
		2		282	18		24.6	37.14
		2		284	20		28	38.86
		2		286	22		34.51	40.64
		2		288	24		52.96	48.45
70-71	71	2	2	290	2	34	63.2	56.45
		2		292	4	36.28	68.16	61.8
		2		294	6	38.56	89.82	71.05
		2		296	8	40.84	98.85	95.58
		2		298	10	39.32	77.1	119.06
		2		300	12	37.04	58.24	134.32
		2		302	14	34.76	49	128.47
		2		304	16	33.3	45.49	110.69
		2		306	18	31.9	43.15	88.79
		2		308	20	30.5	41.98	74.38
		2		310	22	29.1	41.98	68.94
		2		312	24	27.7	41.98	66.86
70-71	71	2	3	314	2			77.28
		2		316	4			78.36
		2		318	6			75.12
		2		320	8			70.08
		2		322	10			64.51
		2		324	12			60.09
		2		326	14			56.92
		2		328	16			55.38
		2		330	18			53.16
		2		332	20			52.42
		2		334	22			51
		2		336	24			51.7
70-71	71	2	19	338	2	25.35	24.6	38.72	9.57
		2		340	4	27	26.3	41.95	11.19
		2		342	6	29.1	28.93	43.34	13.14
		2		344	8	36.28	28	44.72	13.14
		2		346	10	39.32	26.3	45.42	12
		2		348	12	43.38	26.3	46.81	11.46
		2		350	14	46.94	27.15	47.51	10.65
		2		352	16	49.61	29.86	48.2	9.84
		2		354	18	52.5	34.51	47.51	9.3
		2		356	20	50.5	39.64	54.64	8.88
		2		358	22	49.61	49	58.48	9.09
		2		360	24	48.82	58.24	62.73	9.3
70-71	71	2	20	362	2			66.79
		2		364	4			71.55
		2		366	6			75.66
		2		368	8			79.48
		2		370	10			82.41
		2		372	12			81.24
		2		374	14			76.74
		2		376	16			71.55
		2		378	18			63.17
		2		380	20			58.87
		2		382	22			58.09
		2		384	24			57.31
70-71	71	2	21	386	2	37.8	39.64		6.18
		2		388	4	37.04	38.47		6.01
		2		390	6	36.28	36.37		6.01
		2		392	8	35.52	35.44		6.01
		2		394	10	39.32	34.51		7.03
		2		396	12	43.38	33.58		8.04
		2		398	14	47.83	32.65		9.3
		2		400	16	52.5	31.72		10.65
		2		402	18	50.5	36.37		10.38
		2		404	20	49.61	62.2		10.38
		2		405	21		65.18
		2		406	22	47.83	58.24		10.11
		2		408	24	46.94	69.65		10.11
		2		409	1		77.1
70-71	71	2	22	410	2		74.12	67.38
		2		412	4		58.24	79.5
		2		414	6		52.96	86.86
		2		416	8		50.32	99.15
		2		418	10		44.32	93.52
		2		420	12		39.64	73.83
		2		422	14		37.3	71.05
		2		424	16		83.46	60.8
		2		425	17		100.7
		2		426	18		83.46	58.59
		2		428	20		54.28	73.83
		2		430	22		41.98	97.72
		2		432	24		37.3	254.16
70-71	71	2	23	434	2			114.82
		2		436	4			102.79
		2		438	6			99.15
		2		440	8			96.3
		2		442	10			84.96
		2		444	12			77.77
		2		446	14			69.98
		2		448	16			60.8
		2		450	18			51.34
		2		452	20			50.51
		2		454	22			49.68
		2		456	24			48.86
70-71	71	2	27	458	2	55.5	52.96	58.16
		2		460	4	58.5	55.6	60.3
		2		462	6	61.57	58.24	62.8
		2		464	8	66.92	58.24	65.82
		2		466	10	70.13	59.56	69.98
		2		468	12	74.83	60.88	74.38
		2		470	14	78.46	66.67	78.35
		2		472	16	82.09	65.18	83.06
		2		474	18	84.54	63.69	83.7
		2		476	20	80.88	66.67	84.96
		2		478	22	76.04	71.14	86.22
		2		480	24	72.41	74.12	86.86
70-71	71	2	28	482	2			88.12	5.84
		2		484	4			89.47	6.01
		2		486	6			90.82	6.01
		2		488	8			91.49	6.69
		2		490	10			85.59	7.41
		2		492	12			79.5	8.04
		2		494	14			74.38	8.67
		2		496	16			69.46	9.4
		2		498	18			70.5	8.88
		2		500	20			71.61	8.46
		2		502	22			73.27	8.04
		2		504	24			74.37	7.62
70-71	71	2	29	506	2			76.05
		2		508	4			77.2
		2		510	6			78.35
		2		512	8			79.5
		2		514	10			73.83
		2		516	12			67.9
		2		518	14			62.3
		2		520	16			57.73
		2		522	18			58.59
		2		524	20			59.87
		2		526	22			60.8
		2		528	24			62.3
70-71	71	2	30	530	2			63.3
		2		532	4			64.3
		2		534	6			65.82
		2		536	8			66.86
		2		538	10			68.42
		2		540	12			60.3
		2		542	14			57.3
		2		544	16			54.31
		2		546	18			55.17
		2		548	20			55.59
		2		550	22			56.02
		2		552	24			56.88
70-71	71	3	11	554	2			57.73
		3		556	4			59.02
		3		558	6			60.8
		3		560	8			62.8
		3		562	10			59.02
		3		564	12			55.59
		3		566	14			52.18
		3		568	16			48.86
		3		570	18			50.1
		3		572	20			51.34
		3		574	22			53.03
		3		576	24			54.31
70-71	71	3	12	578	2			55.59
		3		580	4			57.3
		3		582	6			58.59
		3		584	8			59.87
		3		586	10			56.88
		3		588	12			53.88
		3		590	14			50.92
		3		592	16			48.03
		3		594	18			48.86
		3		596	20			49.68
		3		598	22			50.1
		3		600	24			50.92
70-71	71	3	14	602	2			49.68
		3		604	4			50.51
		3		606	6			51.34
		3		608	8			52.18
		3		610	10			49.68
		3		612	12			46.82
		3		614	14			44.02
		3		616	16			41.76
		3		618	18			42.13
		3		620	20			42.5
		3		622	22			42.88
		3		624	24			43.25
70-71	71	5	19	626	2		5.54
		5		628	4		5.54
		5		630	6		5.54
		5		632	8		5.54
		5		634	10		5.88
		5		636	12		5.88
		5		638	14		5.88
		5		640	16		5.88
		5		642	18		5.88
		5		643	19		33.58
		5		644	20		37.3
		5		646	22		11.66
		5		648	24		9.36
70-71	71	5	20	650	2			5.1
		5		652	4			5.4
		5		654	6			5.85
		5		656	8			7.12
		5		658	10			8.24
		5		660	12			8.72
		5		662	14			9.04
		5		664	16			9.37
		5		666	18			9.2
		5		668	20			8.24
		5		670	22			8.24
		5		672	24			8.24
71-72	71	8	16	674	2	11.82	7.58	9.19	3.25
		8		676	4	13.99	16.72	10.21	3.58
		8		678	6	15.9	14	11.91	3.92
		8		680	8	18.26	16.72	12.59	4.26
		8		682	10	18.64	22.92	14.15	4.15
		8		684	12	19.02	24.02	16.81	4.15
		8		686	14	19.02	20.73	19.25	5.97
		8		688	16	19.4	18.54	18	5.84
		8		690	18	17.88	18.54	17.27	5.58
		8		692	20	16.54	19.64	16.81	5.34
		8		694	22	15.26	20.73	16.81	5.22
		8		696	24	13.99	20.73	15.2	4.98
71-72	71	8	17	698	2		22.38
		8		700	4		20.18
		8		702	6		18.54
		8		704	8		16.72
		8		706	10		14.91
		8		708	12		14
		8		710	14		13.15
		8		712	16		12.3
		8		714	18		11.88
		8		716	20		11.45
		8		718	22		11.02
		8		720	24		10.6
71-72	71	8	21	722	2	14.94	12.3	9.87
		8		724	4	16.54	12.3	10.04
		8		726	6	18.26	15.82	10.38
		8		728	8	20.16	19.64	11.4
		8		730	10	16.86	17.18	14.57
		8		732	12	14.3	21.28	13.94
		8		734	14	11.82	22.92	13.52
		8		736	16	9.7	19.64	10.89
		8		738	18	9.45	17.63	10.72
		8		740	20	9.45	15.82	10.55
		8		742	22	9.45	14.91	10.55
		8		744	24	9.2	14	10.38
71-72	71	9	1	746	2	9.95	7.22
		9		748	4	10.95	7.58
		9		750	6	12.13	7.94
		9		752	8	13.06	9.39
		9		754	10	13.37	12.3
		9		756	12	13.68	11.88
		9		758	14	13.99	13.58
		9		760	16	14.3	17.18
		9		762	18	13.68	16.27
		9		764	20	13.06	15.82
		9		766	22	12.13	14.45
		9		768	24	11.51	16.27
71-72	71	9	2	770	2		16.27	18.5
		9		772	4		18.09	19.5
		9		774	6		22.92	20.5
		9		776	8		21.28	21.25
		9		778	10		18.54	19.5
		9		780	12		16.72	18
		9		782	14		14.45	16.58
		9		784	16		12.72	15.2
		9		786	18		11.02	15.2
		9		788	20		10.18	14.99
		9		790	22		10.18	14.99
		9		792	24		10.18	14.78
71-72	71	9	25	794	2			13.1
		9		796	4			14.78
		9		798	6			15.66
		9		800	8			17.5
		9		802	10			18.5
		9		804	12			16.58
		9		806	14			16.12
		9		808	16			15.66
		9		810	18			15.66
		9		812	20			15.2
		9		814	22			15.2
		9		816	24			15.2
71-72	71	12	8	818	2	5.2
		12		820	4	5.2
		12		822	6	5.45
		12		824	8	6.72
		12		826	10	7.82
		12		828	12	7.82
		12		830	14	8.7
		12		832	16	9.2
		12		834	18	9.45
		12		836	20	9.2
		12		838	22	8.95
		12		840	24	8.95
71-72	71	12	12	842	2	9.45
		12		844	4	8.95
		12		846	6	8.48
		12		848	8	12.44
		12		850	10	13.68
		12		852	12	14.62
		12		854	14	15.9
		12		856	16	15.58
		12		858	18	14.94
		12		860	20	13.99
		12		862	22	13.06
		12		864	24	12.44
71-72	72	1	8	866	2			22
		1		868	4			27.8
		1		870	6			25.4
		1		872	8			23.37
		1		874	10			22
		1		876	12			20.5
		1		878	14			19.75
		1		880	16			19.25
		1		882	18			18.75
		1		884	20			18.75
		1		886	22			19.75
		1		888	24			22.5
71-72	72	1	9	890	2			26.6
		1		892	4			29.33
		1		894	6			28.1
		1		896	8			25.4
		1		898	10			23.37
		1		900	12			22
		1		902	14			20.5
		1		904	16			19.75
		1		906	18			19.5
		1		908	20			19.25
		1		910	22			20
		1		912	24			22.5
71-72	72	1	10	914	2			27.2
		1		916	4			32.49
		1		918	6			31.19
		1		920	8			27.2
		1		922	10			23.66
		1		924	12			21.75
		1		926	14			20.75
		1		928	16			20.25
		1		930	18			19.75
		1		932	20			19.75
		1		934	22			20.5
		1		936	24			22
71-72	72	1	11	938	2			24.82
		1		940	4			28.1
		1		942	6			28.1
		1		944	8			26.3
		1		946	10			23.66
		1		948	12			22
		1		950	14			21
		1		952	16			20.25
		1		954	18			19.75
		1		956	20			20
		1		958	22			20.5
		1		960	24			21.5
71-72	72	1	13	962	2			21.5	8.6
		1		964	4			22.25	8.42
		1		966	6			22.79	8.42
		1		968	8			22.79	8.25
		1		970	10			23.08	8.94
		1		972	12			23.08	9.64
		1		974	14			23.08	10.44
		1		976	16			23.08	11.04
		1		978	18			23.66	11.44
		1		980	20			25.11	11.88
		1		982	22			26	12.36
		1		984	24			27.8	12.6
71-72	72	1	14	986	2			30.57
		1		988	4			36.55
		1		990	6			37.25
		1		992	8			34.14
		1		994	10			30.57
		1		996	12			28.4
		1		998	14			26.6
		1		1000	16			25.11
		1		1002	18			24.53
		1		1004	20			23.95
		1		1006	22			23.95
		1		1008	24			24.82
71-72	72	1	18	1010	2	18.26	21.28	23.66
		1		1012	4	19.4	21.83	24.82
		1		1014	6	20.54	21.83	25.7
		1		1016	8	21.74	20.73	25.4
		1		1018	10	22.18	21.28	24.82
		1		1020	12	22.62	22.92	25.11
		1		1022	14	23.06	25.15	25.7
		1		1024	16	23.5	27.98	28.1
		1		1026	18	23.94	30.39	31.19
		1		1028	20	28.58	29.68	35.15
		1		1030	22	33.92	29.11	37.25
		1		1032	24	39.8	30.39	37.25
71-72	72	1	19	1034	2	52.35	30.39	37.95
		1		1036	4	59.52	29.68	40.15
		1		1038	6	68.84	29.68	38.67
		1		1040	8	70.86	34.63	36.55
		1		1042	10	65.81	46.2	39.78
		1		1044	12	56	57	50.4
		1		1046	14	50.16	59	57
		1		1048	16	33.92	83.25	66.79
		1		1049	17		98.2
		1		1050	18	30.5	83.25	80.1
		1		1052	20	28.1	53	103
		1		1054	22	25.7	39.07	128.9
		1		1056	24	23.94	33.92	113.9
71-72	72	1	20	1058	2			83.8
		1		1060	4			61.04
		1		1062	6			45.6
		1		1064	8			39.78
		1		1066	10			36.2
		1		1068	12			33.48
		1		1070	14			31.83
		1		1072	16			30.26
		1		1074	18			29.02
		1		1076	20			28.4
		1		1078	22			28.71
		1		1080	24			29.64
71-72	72	1	22	1082	2	26.18	35.34	36.2
		1		1084	4	27.62	38.3	39.78
		1		1086	6	29.06	33.92	47.76
		1		1088	8	30.5	31.09	54.08
		1		1090	10	31.07	30.39	53.16
		1		1092	12	26.66	32.51	45.6
		1		1094	14	32.78	33.92	42.4
		1		1096	16	33.35	39.07	43.2
		1		1098	18	31.07	43.72	45.6
		1		1099	19		44.5
		1		1100	20	29.06	43.72	50.4
		1		1102	22	27.62	39.85	57
		1		1104	24	25.7	35.34	62.08
71-72	72	1	23	1106	2			61.56
		1		1108	4			55.5
		1		1110	6			49.52
		1		1112	8			44.4
		1		1114	10			40.52
		1		1116	12			37.6
		1		1118	14			35.85
		1		1120	16			35.5
		1		1122	18			33.48
		1		1124	20			32.82
		1		1126	22			32.49
		1		1128	24			32.16
71-72	72	1	28	1130	2			35.85
		1		1132	4			39.41
		1		1134	6			42
		1		1136	8			42
		1		1138	10			41.26
		1		1140	12			40.15
		1		1142	14			38.3
		1		1144	16			36.9
		1		1146	18			35.5
		1		1148	20			34.47
		1		1150	22			33.81
		1		1152	24			33.15
71-72	72	1	30	1154	2	25.26
		1		1156	4	24.82
		1		1158	6	24.38
		1		1160	8	27.62
		1		1162	10	28.1
		1		1164	12	30.5
		1		1166	14	33.35
		1		1168	16	36.8
		1		1170	18	39.2
		1		1172	20	39.8
		1		1174	22	40.4
		1		1176	24	41
71-72	72	1	31	1178	2	37.4	43.72	43.6
		1		1180	4	40.4	43.72	48.64
		1		1182	6	41	43.72	52.7
		1		1184	8	41.6	43.72	56
		1		1186	10	44.15	44.5	57.5
		1		1188	12	46.75	47.05	57.5
		1		1190	14	48.7	50.45	58.5
		1		1192	16	51.62	50.45	61.04
		1		1194	18	48.7	56	64.68
		1		1196	20	45.45	66.6	68.91
		1		1198	22	42.85	71.4	72.9
		1		1200	24	41	69	80.1
71-72	72	2	1	1202	2		58	92.25
		2		1204	4		51.3	103.75
		2		1206	6		47.9	109
		2		1208	8		44.5	100.75
		2		1210	10		42.95	85.75
		2		1212	12		40.62	72.9
		2		1214	14		39.07	63.64
		2		1216	16		38.3	58.5
		2		1218	18		36.75	54.54
		2		1220	20		36.04	51.78
		2		1222	22		36.04	49.52
		2		1224	24		36.04	48.2
71-72	72	2	6	1226	2		27.98
		2		1228	4		29.68
		2		1230	6		36.04
		2		1231	7		36.75
		2		1232	8		36.04
		2		1234	10		31.8
		2		1236	12		29.68
		2		1238	14		28.55
		2		1240	16		26.85
		2		1242	18		25.72
		2		1244	20		25.75
		2		1246	22		25.15
		2		1248	24		25.15
71-72	72	2	22	1250	2	33.92	41.38	38.3	11.24
		2		1252	4	52.35	42.82	40.52	11.24
		2		1254	6	63.04	44.28	42	11.44
		2		1256	8	70.86	70.34	43.6	11.64
		2		1258	10	76.03	61.6	49.52	14.87
		2		1260	12	67.83	71.46	59	18.47
		2		1262	14	60.4	93.5	68.38	23.39
		2		1263	15		102.6
		2		1264	16	60.4	99.5	81.3	29.1
		2		1266	18	52.35	79.85	97	30.9
		2		1267	19		122.1
		2		1268	20	51.62	109	143	32.7
		2		1269	21		102.6
		2		1270	22	53.08	112.2	167.4	33.9
		2		1272	24	53.81	176.85	185.9	36.16
71-72	72	2	23	1274	2	30.5	188.55	239	38.65
		2		1276	4	38.6	230	239	41.14
		2		1277	5		245.61
		2		1278	6	46.75	222	239	43.9
		2		1280	8	56	190.5	336.24	47.22
		2		1282	10	58.64	130.6	336.24	29.1
		2		1284	12	60.4	92	239	36.16
		2		1286	14	61.28	78.62	207.5	24.23
		2		1288	16	63.04	73.7	194	20.04
		2		1290	18	64.8	71.46	137	19.07
		2		1292	20	80.55	70.34	128	19.07
		2		1294	22	127.3	68.1	128	18.42
		2		1296	24	201.64	66.98	123.5	16.8
71-72	72	2	24	1298	2			118.15
		2		1300	4			117.3
		2		1302	6			115.6
		2		1304	8			114.75
		2		1306	10			99.25
		2		1308	12			85.75
		2		1310	14			73.5
		2		1312	16			62.6
		2		1314	18			63.012
		2		1316	20			64.16
		2		1318	22			64.68
		2		1320	24			65.2
71-72	72	3	11	1322	2	44.86
		3		1324	4	46.24
		3		1326	6	47.62
		3		1328	8	49
		3		1330	10	49.8
		3		1332	12	49.8
		3		1334	14	50.6
		3		1336	16	50.6
		3		1338	18	50.6
		3		1340	20	50.6
		3		1342	22	49.8
		3		1344	24	49.8
72-73	72	8	20	1346	2	12.3	11.92	25.36
		8		1348	4	13.62	14.68	27.84
		8		1350	6	14.5	21.3	29.92
		8		1351	7		25.99
		8		1352	8	18.82	23.98	37.8
		8		1354	10	26.41	20.16	45.4
		8		1356	12	27.04	17.88	41.52
		8		1358	14	38.55	16.74	40.28
		8		1360	16	35.55	15.6	34.32
		8		1362	18	34.15	19.02	31.48
		8		1364	20	30.25	21.97	30.44
		8		1366	22	26.41	21.97	28.88
		8		1368	24	23.26	22.64	27.84
72-73	72	9	3	1370	2	12.26	9.48	15.12
		9		1372	4	19.35	10.24	15.12
		9		1374	6	22	11	14.8
		9		1376	8	22.63	11.46	14.8
		9		1378	10	29.6	12.38	16.72
		9		1380	12	34.8	13.76	18.8
		9		1382	14	60.12	16.74	21.2
		9		1384	16	58.4	21.97	23.44
		9		1386	18	58.4	31.85	24.4
		9		1388	20	51.84	35.7	25.84
		9		1390	22	47.04	35.7	27.32
		9		1392	24	40.8	33.39	28.36
72-73	72	9	4	1394	2		29.54	29.4
		9		1396	4		28	30.96
		9		1398	6		28	32.58
		9		1400	8		28	33.74
		9		1402	10		25.32	29.4
		9		1404	12		21.97	25.84
		9		1406	14		19.59	22.48
		9		1408	16		17.88	19.2
		9		1410	18		16.74	19.6
		9		1412	20		16.17	20.4
		9		1414	22		15.6	20.8
		9		1416	24		15.14	21.2
72-73	72	9	5	1418	2	5.6
		9		1420	4	5
		9		1422	6	4.4
		9		1424	8	4.6
		9		1426	10	5
		9		1428	12	5.8
		9		1430	14	11.45
		9		1432	16	9.89
		9		1434	18	9.5
		9		1436	20	8.57
		9		1438	22	7.64
		9		1440	24	6.71
72-73	72	10	12	1442	2	3.36	8.72	13.3
		10		1444	4	3.4	8.72	13.6
		10		1446	6	3.5	8.72	13.6
		10		1448	8	7.02	8.72	13.9
		10		1450	10	13.96	9.1	14.2
		10		1452	12	24.85	9.48	14.2
		10		1454	14	38.8	10.24	14.8
		10		1456	16	61.95	12.84	15.44
		10		1458	18	74.55	17.31	18
		10		1460	20	73.5	27.33	24.88
		10		1462	22	72.45	46.64	32
		10		1464	24	71.4	62.64	44
		10		1465	1		73.32
72-73	72	10	13	1466	2		72.1	55.5
		10		1468	4		58.16	65.5
		10		1470	6		43.71	71.6
		10		1472	8		34.93	64.9
		10		1474	10		30.31	51
		10		1476	12		25.99	39.04
		10		1478	14		23.31	33.74
		10		1480	16		20.73	29.92
		10		1482	18		19.59	27.32
		10		1484	20		20.16	25.36
		10		1486	22		21.97	25.36
		10		1488	24		23.31	26.8
72-73	72	12	7	1490	2	5.6
		12		1492	4	5.4
		12		1494	6	5.4
		12		1496	8	5.6
		12		1498	10	6.2
		12		1500	12	6.4
		12		1502	14	13.4
		12		1504	16	13.01
		12		1506	18	13.01
		12		1508	20	12.62
		12		1510	22	12.62
		12		1512	24	12.23
72-73	73	1	1	1514	2	7.02		13.6
		1		1516	4	7.02		14.2
		1		1518	6	7.02		14.8
		1		1520	8	7.02		15.12
		1		1522	10	7.33		15.76
		1		1524	12	13.96		16.4
		1		1526	14	19		18.4
		1		1528	16	23.55		21.6
		1		1530	18	23.55		21.6
		1		1532	20	20.95		20.8
		1		1534	22	19		19.6
		1		1536	24	16.76		18.8
72-73	73	1	11	1538	2	23.64
		1		1540	4	24.8
		1		1542	6	26.1
		1		1544	8	27.4
		1		1546	10	28.7
		1		1548	12	30
		1		1550	14	30.7
		1		1552	16	32.1
		1		1554	18	32.1
		1		1556	20	33.5
		1		1558	22	34.2
		1		1560	24	40.2
72-73	73	1	12	1562	2	39.7	28.77	36.06	10.97
		1		1564	4	41.5	28.77	36.64	10.97
		1		1566	6	42.4	28.77	36.64	11.15
		1		1568	8	44.42	28.77	36.64	11.15
		1		1570	10	49.47	31.85	37.8	12.05
		1		1572	12	92.4	36.59	40.28	12.95
		1		1574	14	114.3	49.7	46.1	13.9
		1		1576	16	84	69.66	58.5	15.9
		1		1578	18	81.9	97.5	91.5	18.08
		1		1580	20	87.15	92.3	143.7	19.2
		1		1582	22	85.05	87.16	138.5	14.85
		1		1584	24	37.9	87.16	136	11.15
72-73	73	1	13	1586	2	38.8	81	161.25	11.15
		1		1588	4	37.2	75.76	168	11.15
		1		1590	6	35.7	69.66	141	11.15
		1		1592	8	35	59.28	105.5	11.15
		1		1594	10	34.2	48.68	89.5	10.07
		1		1596	12	32.8	42.82	75	9
		1		1598	14	32.1	39.26	62.5	7.95
		1		1600	16	30.7	36.59	51	6.96
		1		1602	18	30	34.16	48.9	6.96
		1		1604	20	28.7	32.62	46.8	6.96
		1		1606	22	28	32.62	44.7	6.96
		1		1608	24	33.5	31.08	43.38	6.96
72-73	73	2	7	1610	2			40.9
		2		1612	4			45.4
		2		1614	6			55.5
		2		1616	8			54
		2		1618	10			51
		2		1620	12			47.5
		2		1622	14			44
		2		1624	16			41.52
		2		1626	18			38.42
		2		1628	20			37.22
		2		1630	22			37.22
		2		1632	24			38.42
72-73	73	2	9	1634	2	24.85
		2		1636	4	24.2
		2		1638	6	24.2
		2		1640	8	23.55
		2		1642	10	22.9
		2		1644	12	22.9
		2		1646	14	22.25
		2		1648	16	21.6
		2		1650	18	21.6
		2		1652	20	36.1
		2		1654	22	49.47
		2		1656	24	108.8
72-73	73	2	10	1658	2	112.1	48.68	55.5	8.82
		2		1660	4	119.6	62.64	61.7	9.71
		2		1662	6	125.81	76.98	68.2	10.46
		2		1664	8	119.6	91	96.7	9.71
		2		1666	10	116.5	93.6	128.5	9.18
		2		1668	12	96.7	100.1	161.25	8.48
		2		1669	13		126.92
		2		1670	14	85.05	125.56	173.8	6.8
		2		1672	16	82.95	96.2	190	6.32
		2		1674	18	72.45	78.2	213.19	6.32
		2		1676	20	67.2	69.66	182.5	6.16
		2		1678	22	63	66	128.5	6.16
		2		1680	24	57.75	62.64	96.7	6
72-73	73	2	11	1682	2			111
		2		1684	4			97.8
		2		1686	6			85.5
		2		1688	8			75
		2		1690	10			69.9
		2		1692	12			65.7
		2		1694	14			60.9
		2		1696	16			57
		2		1698	18			56.25
		2		1700	20			55.5
		2		1702	22			54.75
		2		1704	24			54
72-73	73	2	14	1706	2			36.64
		2		1708	4			36.64
		2		1710	6			36.64
		2		1712	8			36.64
		2		1714	10			36.64
		2		1716	12			36.64
		2		1718	14			36.64
		2		1720	16			37.8
		2		1722	18			44
		2		1724	20			52.5
		2		1726	22			58.5
		2		1728	24			54.75
72-73	73	4	7	1730	2			12.1
		4		1732	4			13
		4		1734	6			13.9
		4		1736	8			14.8
		4		1738	10			17.04
		4		1740	12			19.6
		4		1742	14			22.48
		4		1744	16			25.36
		4		1746	18			24.4
		4		1748	20			23.92
		4		1750	22			22.96
		4		1752	24			22
72-73	73	6	18	1754	2			2.8
		6		1756	4			4.28
		6		1758	6			5.88
		6		1760	8			7.48
		6		1762	10			6.84
		6		1764	12			6.2
		6		1766	14			5.56
		6		1768	16			5.08
		6		1770	18			5.08
		6		1772	20			4.92
		6		1774	22			4.76
		6		1776	24			4.76
73-74	73	8	13	1778	2	11.61
		8		1780	4	11.32
		8		1782	6	11.32
		8		1784	8	11.91
		8		1786	10	13.73
		8		1788	12	13.73
		8		1790	14	16.95
		8		1792	16	17.65
		8		1794	18	17.3
		8		1796	20	16.6
		8		1798	22	15.9
		8		1800	24	15.59
73-74	73	9	2	1802	2		8.08
		9		1804	4		8.08
		9		1806	6		8.74
		9		1808	8		9.08
		9		1810	10		10.4
		9		1812	12		17.08
		9		1814	14		20.05
		9		1816	16		18.95
		9		1818	18		17.08
		9		1820	20		17.96
		9		1822	22		17.08
		9		1824	24		14.88
73-74	73	9	7	1826	2		7.42	8.03
		9		1828	4		7.42	8.03
		9		1830	6		7.75	8.03
		9		1832	8		7.75	8.03
		9		1834	10		8.41	10.16
		9		1836	12		9.41	12.49
		9		1838	14		11.48	15.61
		9		1840	16		20.05	18.76
		9		1842	18		29.52	26.86
		9		1844	20		39.36	37.3
		9		1846	22		44.16	44.15
		9		1848	24		40.32	53.4
73-74	73	9	8	1850	2		30.15	49.65
		9		1852	4		22.8	37.62
		9		1854	6		18.4	24.8
		9		1856	8		15.76	20.8
		9		1858	10		14	19.08
		9		1860	12		12.56	16.93
		9		1862	14		11.48	15.42
		9		1864	16		11.12	13.62
		9		1866	18		10.4	13.26
		9		1868	20		10.07	12.9
		9		1870	22		9.74	12.6
		9		1872	24		9.74	12.3
73-74	74	1	5	1874	2		14	7.21
		1		1876	4		14.88	7.48
		1		1878	6		16.2	7.75
		1		1880	8		17.52	8.02
		1		1882	10		17.52	8.29
		1		1884	12		17.08	8.29
		1		1886	14		16.64	8.83
		1		1888	16		16.64	9.37
		1		1890	18		15.76	11.7
		1		1892	20		14.44	14.7
		1		1894	22		13.64	12.9
		1		1896	24		12.56	11.7
73-74	74	1	14	1898	2		9.08	9.1
		1		1900	4		10.07	9.37
		1		1902	6		11.48	9.91
		1		1904	8		13.64	10.81
		1		1906	10		16.2	12.6
		1		1908	12		18.95	14.7
		1		1910	14		18.4	18.65
		1		1912	16		17.96	20.37
		1		1914	18		17.52	20.37
		1		1916	20		18.95	19.08
		1		1918	22		22.25	19.94
		1		1920	24		25.15	21.8
73-74	74	1	15	1922	2		25.77	24.8
		1		1924	4		27.02	29.22
		1		1926	6		31.8	30.93
		1		1928	8		32.62	34.9
		1		1930	10		37.58	39.74
		1		1932	12		32.62	49.77
		1		1934	14		29.52	46.33
		1		1936	16		27.02	43.34
		1		1938	18		23.35	38.3
		1		1940	20		21.15	33.54
		1		1942	22		19.5	28.65
		1		1944	24		18.4	24.8
73-74	74	1	16	1946	2		17.96	23.3
		1		1948	4		17.08	20.8
		1		1950	6		16.64	20.37
		1		1952	8		16.2	19.94
		1		1954	10		15.76	19.08
		1		1956	12		15.32	18.65
		1		1958	14		14.88	17.36
		1		1960	16		14.44	16.5
		1		1962	18		14.44	16.14
		1		1964	20		13.64	15.42
		1		1966	22		13.64	15.06
		1		1968	24		13.64	14.7
73-74	74	1	18	1970	2	9.13
		1		1972	4	8.66
		1		1974	6	8.2
		1		1976	8	8.66
		1		1978	10	8.9
		1		1980	12	9.83
		1		1982	14	11.91
		1		1984	16	11.61
		1		1986	18	11.91
		1		1988	20	11.61
		1		1990	22	11.32
		1		1992	24	10.72
73-74	74	1	20	1994	2	10.42
		1		1996	4	10.13
		1		1998	6	9.83
		1		2000	8	10.42
		1		2002	10	10.72
		1		2004	12	13.11
		1		2006	14	15.59
		1		2008	16	15.28
		1		2010	18	15.59
		1		2012	20	15.9
		1		2014	22	15.59
		1		2016	24	15.28
73-74	74	1	21	2018	2	14.97
		1		2020	4	14.66
		1		2022	6	14.35
		1		2024	8	14.97
		1		2026	10	15.59
		1		2028	12	16.95
		1		2030	14	19.78
		1		2032	16	19.78
		1		2034	18	20.17
		1		2036	20	22.86
		1		2038	22	25.38
		1		2040	24	27.94
73-74	74	1	22	2042	2	30.6	12.92	15.78
		1		2044	4	33.51	14	19.51
		1		2046	6	37.2	16.64	24.3
		1		2048	8	38.86	20.6	26.37
		1		2050	10	41.08	22.25	26.94
		1		2052	12	43.35	21.7	28.65
		1		2054	14	46.95	22.8	32.18
		1		2056	16	48.15	24.52	36.26
		1		2058	18	48.75	27.65	41.18
		1		2060	20	43.95	29.52	43.34
		1		2062	22	39.98	30.15	52.97
		1		2064	24	35.62	35.92	69.38
		1		2065	1		41.28
73-74	74	1	23	2066	2		44.16	61
		1		2067	3		47.04
		1		2068	4		45.12	50.48
		1		2069	5		41.28
		1		2070	6		35.92	42.62
		1		2072	8		30.15	36.94
		1		2074	10		27.02	34.22
		1		2076	12		25.15	31.5
		1		2078	14		23.9	29.22
		1		2080	16		22.8	27.51
		1		2082	18		21.7	25.8
		1		2084	20		20.6	24.3
		1		2086	22		20.05	22.8
		1		2088	24		19.5	22.3
73-74	74	1	29	2090	2	13.73
		1		2092	4	13.11
		1		2094	6	12.8
		1		2096	8	13.11
		1		2098	10	14.04
		1		2100	12	14.97
		1		2102	14	16.25
		1		2104	16	16.25
		1		2106	18	16.6
		1		2108	20	37.75
		1		2110	22	65.26
		1		2112	24	79
73-74	74	1	30	2114	2	91.45	16.2	18.65
		1		2116	4	104.14	16.2	27.51
		1		2118	6	107.02	17.96	36.26
		1		2120	8	100.06	20.6	41.18
		1		2122	10	93.3	23.35	57.4
		1		2124	12	86.88	28.28	103.4
		1		2126	14	81.62	31.8	137
		1		2128	16	75.7	47.04	154.25
		1		2130	18	70.75	89.2	160.93
		1		2132	20	65.26	117.81	154.25
		1		2134	22	59.94	107	142.75
		1		2136	24	55.5	99.88	129.02
73-74	74	1	31	2138	2		99.88	111.17
		1		2140	4		92.76	93.59
		1		2142	6		78.21	79.13
		1		2144	8		67.98	68.44
		1		2146	10		58.53	62.8
		1		2148	12		52.68	54.7
		1		2150	14		47.04	49.77
		1		2152	16		41.28	42.62
		1		2154	18		37.58	41.9
		1		2156	20		35.1	41.9
		1		2158	22		32.62	41.18
		1		2160	24		29.52	40.46
73-74	74	2	1	2162	2	25.8	28.9
		2		2164	4	22.1	27.65
		2		2166	6	18.7	27.65
		2		2168	8	19.78	28.9
		2		2170	10	21.32	28.28
		2		2172	12	22.1	24.6
		2		2174	14	24.52	24.6
		2		2176	16	25.38	25.15
		2		2178	18	26.22	24.52
		2		2180	20	25.38	23.9
		2		2182	22	24.95	23.9
		2		2184	24	24.1	23.35
73-74	74	2	2	2186	2	22.86
		2		2188	4	22.1
		2		2190	6	21.71
		2		2192	8	23.25
		2		2194	10	24.52
		2		2196	12	26.22
		2		2198	14	28.83
		2		2200	16	28.83
		2		2202	18	29.27
		2		2204	20	29.27
		2		2206	22	29.27
		2		2208	24	29.72
73-74	74	2	3	2210	2	28.83
		2		2212	4	28.83
		2		2214	6	28.83
		2		2216	8	29.72
		2		2218	10	31.04
		2		2220	12	33.51
		2		2222	14	37.75
		2		2224	16	36.67
		2		2226	18	39.98
		2		2228	20	41.08
		2		2230	22	41.64
		2		2232	24	42.75
73-74	74	2	4	2234	2		22.25	38.05
		2		2236	4		22.8	44.92
		2		2238	6		24.52	57
		2		2240	8		27.02	72.92
		2		2242	10		29.52	85.8
		2		2244	12		35.1	104.1
		2		2246	14		42.24	120.6
		2		2248	16		47.04	120.6
		2		2250	18		52.68	117
		2		2252	20		59.7	109.85
		2		2254	22		55.02	94.9
		2		2256	24		52.68	99.5
73-74	74	2	5	2258	2		51.51	68.84
		2		2260	4		45.12	58.96
		2		2262	6		35.92	53.4
		2		2264	8		32.62	49.8
		2		2266	10		29.52	48
		2		2268	12		28.28	45.69
		2		2270	14		27.65	44.15
		2		2272	16		24.6	41.84
		2		2274	18		25.77	40.3
		2		2276	20		25.15	38.8
		2		2278	22		24.52	38.05
		2		2280	24		23.9	37.3
73-74	74	2	8	2282	2	17.65
		2		2284	4	17.4
		2		2286	6	16.95
		2		2288	8	17.65
		2		2290	10	18.7
		2		2292	12	21.32
		2		2294	14	23.25
		2		2296	16	25.38
		2		2298	18	27.94
		2		2300	20	26.65
		2		2302	22	25.8
		2		2304	24	24.52
73-74	74	2	9	2306	2	23.25
		2		2308	4	22.48
		2		2310	6	21.71
		2		2312	8	22.48
		2		2314	10	24.95
		2		2316	12	27.08
		2		2318	14	29.72
		2		2320	16	35.04
		2		2322	18	38.31
		2		2324	20	41.64
		2		2326	22	34.56
		2		2328	24	32.46
73-74	74	2	11	2330	2	28.39
		2		2332	4	27.94
		2		2334	6	27.08
		2		2336	8	27.5
		2		2338	10	28.39
		2		2340	12	30.6
		2		2342	14	31.49
		2		2344	16	32.98
		2		2346	18	33.51
		2		2348	20	35.09
		2		2350	22	37.2
		2		2352	24	38.86
73-74	74	2	12	2354	2	39.42	27.65	46.46
		2		2356	4	42.75	27.65	48
		2		2358	6	44.55	29.52	49.8
		2		2360	8	45.15	31.8	53.4
		2		2362	10	46.95	33.45	55.2
		2		2364	12	47.55	33.45	58.96
		2		2366	14	48.15	35.95	66.8
		2		2368	16	49.42	36.75	72.92
		2		2370	18	54.15	38.4	74.96
		2		2372	20	50.1	40.32	77
		2		2374	22	46.35	48	81.4
		2		2376	24	43.35	50.34	88
73-74	74	2	13	2378	2	40.53	53.85	92.6
		2		2380	4	37.2	53.85	93.75
		2		2382	6	34.04	58.53	93.75
		2		2384	8	34.56	63.84	92.6
		2		2386	10	38.31	65.22	89.15
		2		2388	12	39.98	63.84	82.5
		2		2390	14	44.55	62.46	78.1
		2		2392	16	49.42	62.46	71.9
		2		2394	18	48.15	58.53	68.84
		2		2396	20	47.55	55.02	66.8
		2		2398	22	46.95	52.68	70.88
		2		2400	24	45.75	48	77
73-74	74	2	14	2402	2	45.15	47.04
		2		2404	4	44.55	48
		2		2406	6	43.95	53.85
		2		2408	8	45.75	58.53
		2		2410	10	46.95	61.08
		2		2412	12	50.1	59.7
		2		2414	14	53.48	57.36
		2		2416	16	57.72	55.02
		2		2418	18	58.46	51.51
		2		2420	20	56.24	49.17
		2		2422	22	54.15	47.04
		2		2424	24	51.45	48
73-74	74	2	15	2426	2	50.1	49.17	96.05
		2		2428	4	48.15	51.51	101.8
		2		2430	6	45.75	53.85	96.05
		2		2432	8	48.15	61.08	90.3
		2		2434	10	50.1	66.6	83.6
		2		2435	11		72.12
		2		2436	12	52.12	67.98	78.1
		2		2438	14	53.48	63.84	72.92
		2		2440	16	56.98	58.53	69.86
		2		2442	18	59.2	53.85	65.82
		2		2444	20	57.72	51.51	62.88
		2		2446	22	56.24	49.17	62.88
		2		2448	24	54.82	47.04	64.84
73-74	74	2	16	2450	2		49.17
		2		2452	4		51.51
		2		2454	6		49.17
		2		2456	8		47.04
		2		2458	10		49.17
		2		2460	12		49.17
		2		2462	14		47.04
		2		2464	16		48
		2		2466	18		50.34
		2		2468	20		52.68
		2		2470	22		55.02
		2		2472	24		57.36
73-74	74	2	21	2474	2	76.52
		2		2476	4	85.12
		2		2478	6	94.22
		2		2480	8	95.15
		2		2482	10	97
		2		2484	12	98.02
		2		2486	14	99.04
		2		2488	16	101.08
		2		2490	18	102.1
		2		2492	20	100.06
		2		2494	22	99.04
		2		2496	24	97
73-74	74	2	23	2498	2	31.49
		2		2500	4	28.83
		2		2502	6	26.22
		2		2504	8	27.94
		2		2506	10	29.72
		2		2508	12	39.98
		2		2510	14	45.75
		2		2512	16	53.48
		2		2514	18	68.4
		2		2516	20	59.94
		2		2518	22	52.8
		2		2520	24	46.35
73-74	74	2	28	2522	2	32.98
		2		2524	4	31.93
		2		2526	6	31.04
		2		2528	8	33.51
		2		2530	10	36.15
		2		2532	12	38.86
		2		2534	14	41.64
		2		2536	16	44.55
		2		2538	18	47.55
		2		2540	20	46.35
		2		2542	22	45.15
		2		2544	24	43.35
73-74	74	2	30	2546	2		30.15
		2		2548	4		30.98
		2		2550	6		30.98
		2		2552	8		30.98
		2		2554	10		30.15
		2		2556	12		30.15
		2		2558	14		28.9
		2		2560	16		28.28
		2		2562	18		27.02
		2		2564	20		26.4
		2		2566	22		28.9
		2		2567	23		50.34
		2		2568	24		46.08
73-74	74	2	31	2570	2			48
		2		2572	4			64.84
		2		2574	6			49.8
		2		2576	8			44.92
		2		2578	10			44.92
		2		2580	12			41.84
		2		2582	14			40.3
		2		2584	16			38.8
		2		2586	18			38.05
		2		2588	20			37.3
		2		2590	22			35.8
		2		2592	24			35.8
73-74	74	3	13	2594	2	36.15	28.9	26.2
		3		2596	4	37.75	28.9	26.2
		3		2598	6	39.42	29.52	26.2
		3		2600	8	39.98	29.52	26.86
		3		2602	10	43.35	30.15	27.52
		3		2604	12	44.55	30.15	28.18
		3		2606	14	45.75	29.52	28.18
		3		2608	16	48.15	29.52	28.18
		3		2610	18	51.45	29.52	30.16
		3		2612	20	49.42	30.15	32.14
		3		2614	22	48.15	33.45	34.3
		3		2616	24	46.95	45.12	41.84
		3		2617	1		48
73-74	74	3	14	2618	2	44.55	46.08	57
		3		2620	4	43.35	45.12	57
		3		2622	6	42.2	41.28	53.4
		3		2624	8	39.98	37.58	49.8
		3		2626	10	37.2	35.1	45.69
		3		2628	12	35.09	34.28	42.61
		3		2630	14	32.98	33.45	41.84
		3		2632	16	30.6	31.8	40.3
		3		2634	18	28.83	30.98	39.55
		3		2636	20	28.83	30.15	38.05
		3		2638	22	28.83	29.52	35.8
		3		2640	24	28.39	42.24	34.3
74-75	74	7	19	2642	2	2.9
		7		2644	4	2.9
		7		2646	6	2.9
		7		2648	8	3
		7		2650	10	3.1
		7		2652	12	3.2
		7		2654	14	3.4
		7		2656	16	3.7
		7		2658	18	4.6
		7		2660	20	4.4
		7		2662	22	4.2
		7		2664	24	3.9
74-75	74	8	12	2666	2	18.2
		8		2668	4	23
		8		2670	6	27.2
		8		2672	8	24.8
		8		2674	10	23
		8		2676	12	20.6
		8		2678	14	18.8
		8		2680	16	16.5
		8		2682	18	14.5
		8		2684	20	13
		8		2686	22	12
		8		2688	24	11.4
74-75	74	8	17	2690	2	5.8
		8		2692	4	6
		8		2694	6	6
		8		2696	8	6.9
		8		2698	10	9
		8		2700	12	15
		8		2702	14	15.5
		8		2704	16	20
		8		2706	18	21.2
		8		2708	20	17
		8		2710	22	13.5
		8		2712	24	11.1
74-75	74	8	19	2714	2	5.4
		8		2716	4	5.4
		8		2718	6	5.2
		8		2720	8	6.3
		8		2722	10	6.9
		8		2724	12	8.1
		8		2726	14	10.5
		8		2728	16	12.5
		8		2730	18	13
		8		2732	20	13.5
		8		2734	22	13.5
		8		2736	24	14
74-75	74	10	17	2738	2	3.7
		10		2740	4	3.5
		10		2742	6	3.2
		10		2744	8	3.5
		10		2746	10	3.8
		10		2748	12	3.8
		10		2750	14	4.2
		10		2752	16	5
		10		2754	18	5.8
		10		2756	20	5
		10		2758	22	4.4
		10		2760	24	3.9
74-75	74	10	19	2762	2	2.8
		10		2764	4	2.75
		10		2766	6	2.7
		10		2768	8	2.95
		10		2770	10	3.1
		10		2772	12	3.5
		10		2774	14	4.2
		10		2776	16	5.2
		10		2778	18	5.8
		10		2780	20	5.2
		10		2782	22	4.8
		10		2784	24	4.2
74-75	74	11	9	2786	2	2.95
		11		2788	4	3
		11		2790	6	3.1
		11		2792	8	3.3
		11		2794	10	3.6
		11		2796	12	4
		11		2798	14	5.6
		11		2800	16	5.6
		11		2802	18	5.8
		11		2804	20	5.4
		11		2806	22	5
		11		2808	24	4.6
74-75	74	11	20	2810	2	6.3
		11		2812	4	8.1
		11		2814	6	9.6
		11		2816	8	11.4
		11		2818	10	13.5
		11		2820	12	17.6
		11		2822	14	47.2
		11		2824	16	82.5
		11		2826	18	96
		11		2828	20	73.2
		11		2830	22	52.7
		11		2832	24	37.8
74-75	74	11	21	2834	2		5.2
		11		2836	4		5.8
		11		2838	6		6.7
		11		2840	8		7.6
		11		2842	10		8.5
		11		2844	12		10.8
		11		2846	14		13.2
		11		2848	16		17
		11		2850	18		22
		11		2852	20		30
		11		2854	22		30
		11		2856	24		25.8
74-75	74	11	22	2858	2		22
		11		2860	4		19
		11		2862	6		17
		11		2864	8		14.5
		11		2866	10		13.2
		11		2868	12		12.4
		11		2870	14		11.6
		11		2872	16		11.6
		11		2874	18		11.6
		11		2876	20		13.6
		11		2878	22		14.5
		11		2880	24		13.6
74-75	75	1	12	2882	2	5
		1		2884	4	5.6
		1		2886	6	5.8
		1		2888	8	6.9
		1		2890	10	7.2
		1		2892	12	11.1
		1		2894	14	11.1
		1		2896	16	12
		1		2898	18	13.5
		1		2900	20	11.1
		1		2902	22	9.6
		1		2904	24	8.1
74-75	75	1	13	2906	2	6.9
		1		2908	4	5.6
		1		2910	6	4.4
		1		2912	8	5.6
		1		2914	10	6.3
		1		2916	12	7.5
		1		2918	14	11.7
		1		2920	16	12
		1		2922	18	12.5
		1		2924	20	5.6
		1		2926	22	5.2
		1		2928	24	10.5
74-75	75	1	14	2930	2	9.6
		1		2932	4	9
		1		2934	6	8.4
		1		2936	8	8.7
		1		2938	10	9.3
		1		2940	12	9.9
		1		2942	14	12
		1		2944	16	12.5
		1		2946	18	13
		1		2948	20	15
		1		2950	22	17.6
		1		2952	24	20.6
74-75	75	1	15	2954	2		12
		1		2956	4		12.4
		1		2958	6		12.8
		1		2960	8		13.2
		1		2962	10		13.2
		1		2964	12		14.5
		1		2966	14		15.5
		1		2968	16		16
		1		2970	18		19
		1		2972	20		21
		1		2974	22		21.5
		1		2976	24		21.5
74-75	75	1	16	2978	2	17.6
		1		2980	4	17
		1		2982	6	16.5
		1		2984	8	13.5
		1		2986	10	11.7
		1		2988	12	10.5
		1		2990	14	9
		1		2992	16	7.8
		1		2994	18	6.6
		1		2996	20	6.6
		1		2998	22	6.6
		1		3000	24	6.6
74-75	75	1	17	3002	2
		1		3004	4
		1		3006	6
		1		3008	8
		1		3010	10
		1		3012	12
		1		3014	14
		1		3016	16
		1		3018	18
		1		3020	20
		1		3022	22
		1		3024	24
74-75	75	1	18	3026	2
		1		3028	4
		1		3030	6
		1		3032	8
		1		3034	10
		1		3036	12
		1		3038	14
		1		3040	16
		1		3042	18
		1		3044	20
		1		3046	22
		1		3048	24
74-75	75	1	19	3050	2	7.2
		1		3052	4	8.4
		1		3054	6	9
		1		3056	8	9.6
		1		3058	10	11.1
		1		3060	12	12.5
		1		3062	14	16
		1		3064	16	17
		1		3066	18	17.6
		1		3068	20	21.2
		1		3070	22	25.4
		1		3072	24	29.8
74-75	75	1	20	3074	2	20
		1		3076	4	20.6
		1		3078	6	21.2
		1		3080	8	23.6
		1		3082	10	26
		1		3084	12	28.4
		1		3086	14	31.4
		1		3088	16	34.6
		1		3090	18	37.8
		1		3092	20	34.6
		1		3094	22	32.2
		1		3096	24	29
74-75	75	1	21	3098	2	27.8
		1		3100	4	25.4
		1		3102	6	23.6
		1		3104	8	25.4
		1		3106	10	27.8
		1		3108	12	29
		1		3110	14	33.8
		1		3112	16	36.2
		1		3114	18	37.8
		1		3116	20	36.2
		1		3118	22	35.4
		1		3120	24	33.8
74-75	75	1	23	3122	2
		1		3124	4
		1		3126	6
		1		3128	8
		1		3130	10
		1		3132	12
		1		3134	14
		1		3136	16
		1		3138	18
		1		3140	20
		1		3142	22
		1		3144	24
74-75	75	1	24	3146	2	14.5	21		5.96
		1		3148	4	14.5	20.5		5.96
		1		3150	6	14.5	20.5		5.96
		1		3152	8	10	20		6.58
		1		3154	10	25.4	20		7.41
		1		3156	12	28.4	20.5		8.24
		1		3158	14	33	21		8.92
		1		3160	16	37	23.5		9.6
		1		3162	18	45	29.4		10.48
		1		3164	20	102.4	37		12.25
		1		3166	22	173	64		14.09
		1		3168	24	253.4	78.4		15.02
74-75	75	1	25	3170	2	246.8	128		13.15
		1		3172	4	310.84	186		11.35
		1		3174	6	275.4	274.26		10.48
		1		3176	8	225	158		9.6
		1		3178	10	181	112		8.41
		1		3180	12	139	72.4		8.24
		1		3182	14	100.8	62.8		8.07
		1		3184	16	68	51.4		7.9
		1		3186	18	45	48.1		7.74
		1		3188	20	42.6	47		7.57
		1		3190	22	41	45		7.41
		1		3192	24	40.2	41		7.24
74-75	75	1	26	3194	2	37.8
		1		3196	4	37
		1		3198	6	36.2
		1		3200	8	35.4
		1		3202	10	33.8
		1		3204	12	32.2
		1		3206	14	30.6
		1		3208	16	29
		1		3210	18	28.4
		1		3212	20	27.4
		1		3214	22	27.2
		1		3216	24	26.6
74-75	75	1	27	3218	2	25.4
		1		3220	4	24.8
		1		3222	6	24.2
		1		3224	8	23.6
		1		3226	10	23.6
		1		3228	12	23
		1		3230	14	23
		1		3232	16	22
		1		3234	18	21.8
		1		3236	20	20.6
		1		3238	22	19.4
		1		3240	24	18.2
74-75	75	1	28	3242	2	17
		1		3244	4	15.5
		1		3246	6	14.5
		1		3248	8	15
		1		3250	10	16
		1		3252	12	16.5
		1		3254	14	19.4
		1		3256	16	21.2
		1		3258	18	22.4
		1		3260	20	21.8
		1		3262	22	21.8
		1		3264	24	21.2
74-75	75	1	30	3266	2	14.5
		1		3268	4	13
		1		3270	6	12.5
		1		3272	8	13
		1		3274	10	15
		1		3276	12	18.2
		1		3278	14	24.8
		1		3280	16	29
		1		3282	18	32.2
		1		3284	20	29
		1		3286	22	27.2
		1		3288	24	21.8
74-75	75	2	11	3290	2	17
		2		3292	4	17.6
		2		3294	6	17.6
		2		3296	8	23
		2		3298	10	24.2
		2		3300	12	26.6
		2		3302	14	28.4
		2		3304	16	30.6
		2		3306	18	31.4
		2		3308	20	21.8
		2		3310	22	24.2
		2		3312	24	24.8
74-75	75	2	13	3314	2	22.4
		2		3316	4	21.8
		2		3318	6	21.8
		2		3320	8	24.2
		2		3322	10	24.8
		2		3324	12	26
		2		3326	14	29
		2		3328	16	29.8
		2		3330	18	31.4
		2		3332	20	30.6
		2		3334	22	29.8
		2		3336	24	29.8
74-75	75	2	14	3338	2	29
		2		3340	4	28.4
		2		3342	6	27.8
		2		3344	8	30.6
		2		3346	10	32.2
		2		3348	12	35.4
		2		3350	14	39.4
		2		3352	16	41.8
		2		3354	18	44.2
		2		3356	20	42.6
		2		3358	22	41
		2		3360	24	39.4
74-75	75	2	25	3362	2	15
		2		3364	4	14
		2		3366	6	14
		2		3368	8	16
		2		3370	10	18.2
		2		3372	12	18.8
		2		3374	14	23
		2		3376	16	26.6
		2		3378	18	30.6
		2		3380	20	27.8
		2		3382	22	26
		2		3384	24	23.6
74-75	75	2	26	3386	2	21.2
		2		3388	4	19.4
		2		3390	6	17
		2		3392	8	18.8
		2		3394	10	20
		2		3396	12	23.6
		2		3398	14	27.2
		2		3400	16	28.4
		2		3402	18	32.2
		2		3404	20	29.8
		2		3406	22	27.8
		2		3408	24	25.4
74-75	75	2	27	3410	2	23.6
		2		3412	4	21.8
		2		3414	6	20
		2		3416	8	22.4
		2		3418	10	24.8
		2		3420	12	25.4
		2		3422	14	27.2
		2		3424	16	27.8
		2		3426	18	27.8
		2		3428	20	27.2
		2		3430	22	26.6
		2		3432	24	26
75-76	76	1	3	3434	2	6.62
		1		3436	4	6.96
		1		3438	6	7.13
		1		3440	8	9.4
		1		3442	10	12
		1		3444	12	14.29
		1		3446	14	15.45
		1		3448	16	16.32
		1		3450	18	16.61
		1		3452	20	15.16
		1		3454	22	13.5
		1		3456	24	12.25
75-76	76	1	5	3458	2	7.51
		1		3460	4	7.13
		1		3462	6	6.79
		1		3464	8	7.93
		1		3466	10	8.77
		1		3468	12	9.4
		1		3470	14	10.45
		1		3472	16	11.5
		1		3474	18	12.25
		1		3476	20	10.03
		1		3478	22	10.24
		1		3480	24	9.19
75-76	76	1	8	3482	2	6.62
		1		3484	4	6.28
		1		3486	6	6.11
		1		3488	8	6.96
		1		3490	10	7.72
		1		3492	12	9.19
		1		3494	14	10.66
		1		3496	16	12
		1		3498	18	13.5
		1		3500	20	12.75
		1		3502	22	12.25
		1		3504	24	11.5
75-76	76	1	10	3506	2	6.96
		1		3508	4	6.79
		1		3510	6	6.45
		1		3512	8	7.51
		1		3514	10	8.56
		1		3516	12	9.61
		1		3518	14	10.66
		1		3520	16	12
		1		3522	18	13.5
		1		3524	20	12.5
		1		3526	22	11.5
		1		3528	24	10.87
75-76	76	1	11	3530	2	9.82	14.36
		1		3532	4	9.19	13.22
		1		3534	6	8.35	11.7
		1		3536	8	8.77	11.06
		1		3538	10	9.19	10.42
		1		3540	12	9.61	9.78
		1		3542	14	10.03	9.46
		1		3544	16	10.45	9.14
		1		3546	18	10.87	9.14
		1		3548	20	10.24	9.46
		1		3550	22	10.03	11.06
		1		3552	24	9.61	12.84
75-76	76	1	14	3554	2	8.56
		1		3556	4	8.35
		1		3558	6	8.14
		1		3560	8	8.77
		1		3562	10	9.19
		1		3564	12	9.82
		1		3566	14	10.45
		1		3568	16	11.08
		1		3570	18	11.75
		1		3572	20	11.75
		1		3574	22	12
		1		3576	24	12
75-76	76	1	18	3578	2	12.5		14.86
		1		3580	4	12		14.86
		1		3582	6	11.5		15.24
		1		3584	8	12		16
		1		3586	10	12.25		17.14
		1		3588	12	12.75		17.9
		1		3590	14	13.5		19.13
		1		3592	16	14.29		19.95
		1		3594	18	14.87		21.18
		1		3596	20	13.75		20.77
		1		3598	22	12.5		20.77
		1		3600	24	11.75		20.36
75-76	76	1	19	3602	2	10.87
		1		3604	4	10.03
		1		3606	6	9.19
		1		3608	8	9.82
		1		3610	10	10.45
		1		3612	12	11.08
		1		3614	14	11.5
		1		3616	16	11.5
		1		3618	18	12.5
		1		3620	20	11.75
		1		3622	22	12
		1		3624	24	11.75
75-76	76	1	20	3626	2	18.88	12.08	16.38
		1		3628	4	20.6	12.08	16.76
		1		3630	6	23	12.46	15.24
		1		3632	8	22.2	12.84	16
		1		3634	10	21.4	14.36	16.76
		1		3636	12	21	15.12	17.52
		1		3638	14	20.2	19	18.31
		1		3640	16	19.54	23.68	19.13
		1		3642	18	19.21	23.68	19.95
		1		3644	20	16.61	21.56	19.13
		1		3646	22	14.87	19	18.72
		1		3648	24	13	19	17.9
75-76	76	1	22	3650	2	10.87
		1		3652	4	11.5
		1		3654	6	12.25
		1		3656	8	12.75
		1		3658	10	13.25
		1		3660	12	13.75
		1		3662	14	14.29
		1		3664	16	14.87
		1		3666	18	15.45
		1		3668	20	14
		1		3670	22	13
		1		3672	24	12
75-76	76	1	24	3674	2	8.14
		1		3676	4	7.51
		1		3678	6	7.13
		1		3680	8	7.51
		1		3682	10	7.93
		1		3684	12	8.56
		1		3686	14	8.98
		1		3688	16	9.61
		1		3690	18	10.03
		1		3692	20	9.82
		1		3694	22	9.4
		1		3696	24	9.19
75-76	76	1	26	3698	2	11.08	10.42	14.48
		1		3700	4	11.75	10.74	14.48
		1		3702	6	12.25	11.7	14.86
		1		3704	8	13.5	12.84	15.62
		1		3706	10	15.45	14.36	16.38
		1		3708	12	17.23	14.74	17.14
		1		3710	14	18.88	14.74	17.9
		1		3712	16	21	15.12	18.72
		1		3714	18	23.4	15.5	19.54
		1		3716	20	22.6	16.5	20.77
		1		3718	22	21.4	17.5	22
		1		3720	24	20.6	18.5	23.41
75-76	76	1	28	3722	2			28.23	9.59
		1		3724	4			29.76	9.88
		1		3726	6			37.02	10.46
		1		3728	8			38.24	10.75
		1		3730	10			37.02	11.04
		1		3732	12			34.7	11.62
		1		3734	14			32.96	11.91
		1		3736	16			31.29	12.2
		1		3738	18			30.27	12.5
		1		3740	20			30.78	14.9
		1		3742	22			31.29	21.14
		1		3744	24			31.8	16.28
75-76	76	1	29	3746	2			32.38
		1		3748	4			32.96
		1		3750	6			33.54
		1		3752	8			29.25
		1		3754	10			30.27
		1		3756	12			28.78
		1		3758	14			27.21
		1		3760	16			25.76
		1		3762	18			24.82
		1		3764	20			25.29
		1		3766	22			25.76
		1		3768	24			24.35
75-76	76	2	2	3770	2	14
		2		3772	4	13.75
		2		3774	6	13.75
		2		3776	8	14.87
		2		3778	10	16.03
		2		3780	12	16.9
		2		3782	14	18.22
		2		3784	16	18.55
		2		3786	18	18.88
		2		3788	20	18.55
		2		3790	22	17.89
		2		3792	24	17.56
75-76	76	2	5	3794	2	18.88
		2		3796	4	23.8
		2		3798	6	25.14
		2		3800	8	25.16
		2		3802	10	27.02
		2		3804	12	27.96
		2		3806	14	28.43
		2		3808	16	29.49
		2		3810	18	30.08
		2		3812	20	29.49
		2		3814	22	28.9
		2		3816	24	28.43
75-76	76	2	6	3818	2			35.86
		2		3820	4			38.88
		2		3822	6			40.8
		2		3824	8			39.52
		2		3826	10			38.24
		2		3828	12			36.44
		2		3830	14			34.7
		2		3832	16			33.54
		2		3834	18			32.38
		2		3836	20			30.78
		2		3838	22			31.78
		2		3840	24			34.7
75-76	76	2	7	3842	2	28.43		38.24
		2		3844	4	28.43		43.36
		2		3846	6	27.96		44.75
		2		3848	8	28.9		43.36
		2		3850	10	29.49		42.08
		2		3852	12	30.08		40.16
		2		3854	14	31.26		39.52
		2		3856	16	33.03		37.6
		2		3858	18	34.21		37.02
		2		3860	20	34.8		35.86
		2		3862	22	36.36		35.86
		2		3864	24	31.26		37.6
75-76	76	2	8	3866	2			41.44
		2		3868	4			44.75
		2		3870	6			46.25
		2		3872	8			50
		2		3874	10			55.85
		2		3876	12			59.33
		2		3878	14			58.46
		2		3880	16			56.72
		2		3882	18			53.24
		2		3884	20			50.75
		2		3886	22			50.75
		2		3888	24			52.37
75-76	76	2	9	3890	2		39.02	54.11
		2		3892	4		37.44	54.11
		2		3894	6		35.86	52.37
		2		3896	8		33.49	50
		2		3898	10		32.7	47
		2		3900	12		32.01	44
		2		3902	14		30.63	41.44
		2		3904	16		29.25	39.52
		2		3906	18		27.87	37.6
		2		3908	20		26.49	34.7
		2		3910	22		25.8	33.54
		2		3912	24		26.49	33.54
75-76	76	2	13	3914	2	15.45
		2		3916	4	15.45
		2		3918	6	15.45
		2		3920	8	15.75
		2		3922	10	16.32
		2		3924	12	17.56
		2		3926	14	18.22
		2		3928	16	18.88
		2		3930	18	19.87
		2		3932	20	19.87
		2		3934	22	19.87
		2		3936	24	19.87
75-76	76	2	14	3938	2			27.72
		2		3940	4			32.38
		2		3942	6			34.7
		2		3944	8			35.28
		2		3946	10			33.54
		2		3948	12			32.96
		2		3950	14			31.8
		2		3952	16			30.78
		2		3954	18			29.25
		2		3956	20			29.25
		2		3958	22			29.25
		2		3960	24			26.23
75-76	76	2	21	3962	2	14.29
		2		3964	4	13.75
		2		3966	6	13.25
		2		3968	8	13.25
		2		3970	10	13.75
		2		3972	12	14.58
		2		3974	14	15.16
[truncated: 641 more rows]
